# Supplementary material
Source: PubMed Central journal article supplement (PMC2938147)

Mα-type genes

# AGL91

|                 |    |
|-----------------|----|
| #Lines analyzed | 23 |
| # Expressors    | 21 |

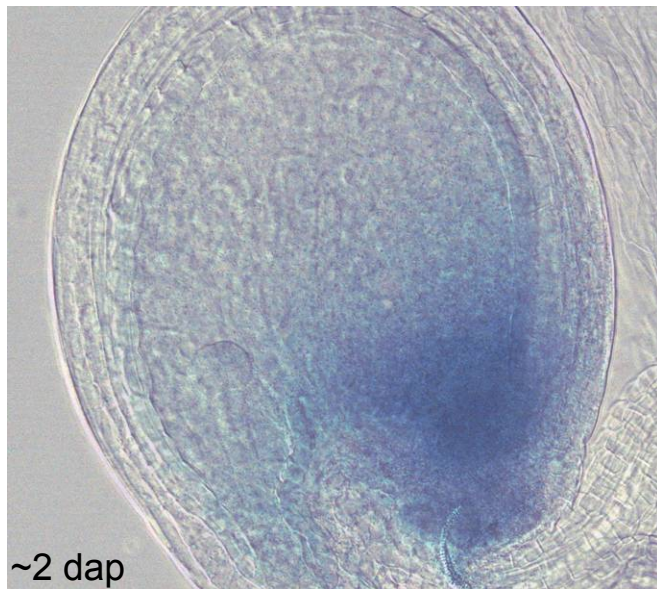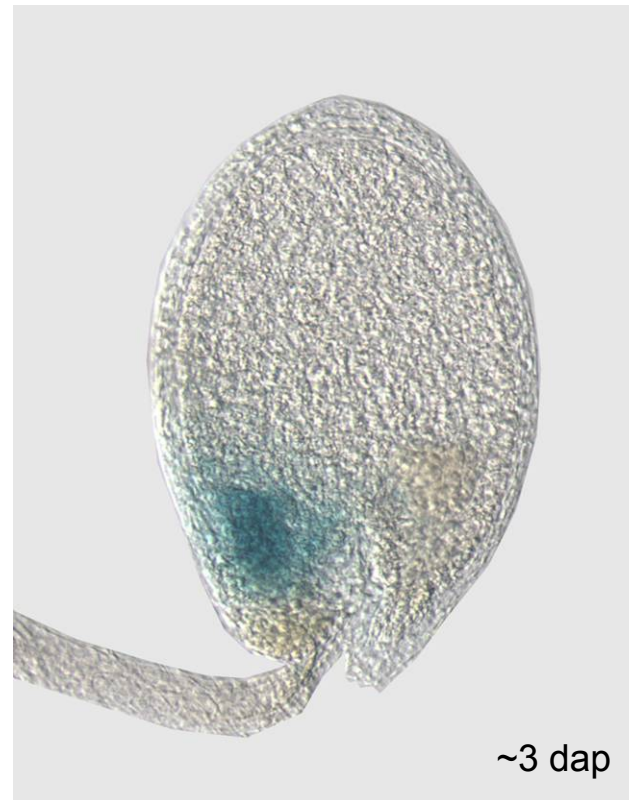

# AGL29

|                 |   |
|-----------------|---|
| #Lines analyzed | 6 |
| # Expressors    | 4 |

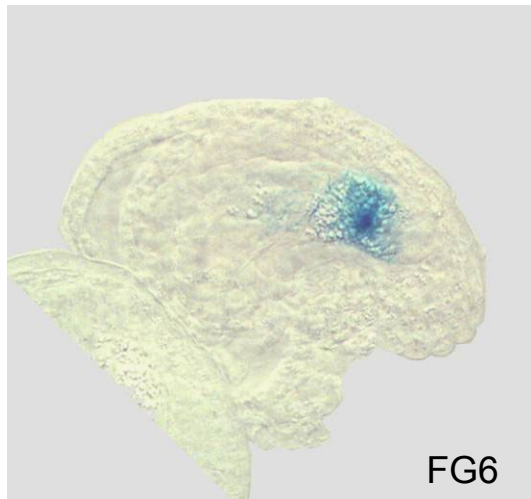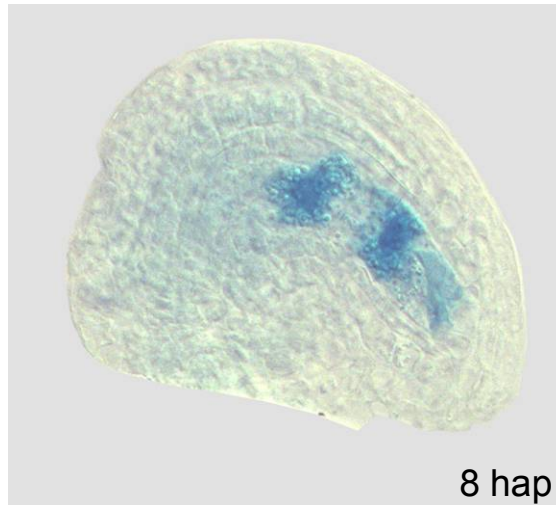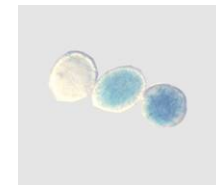

GUS pictures:

pAGL29::AGL29-GFP-GUS

GFP pictures:

pAGL29::GFP-GUS

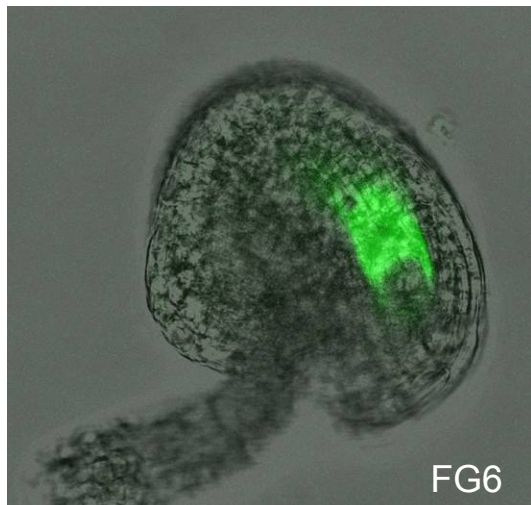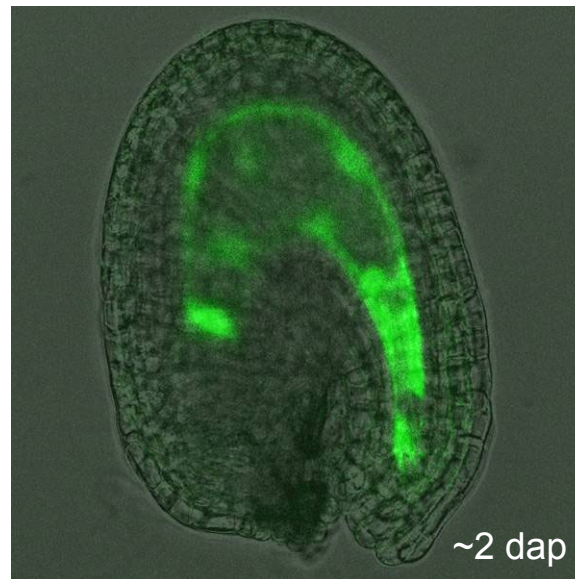

# AGL23

|                 |    |
|-----------------|----|
| #Lines analyzed | 21 |
| # Expressors    | 15 |

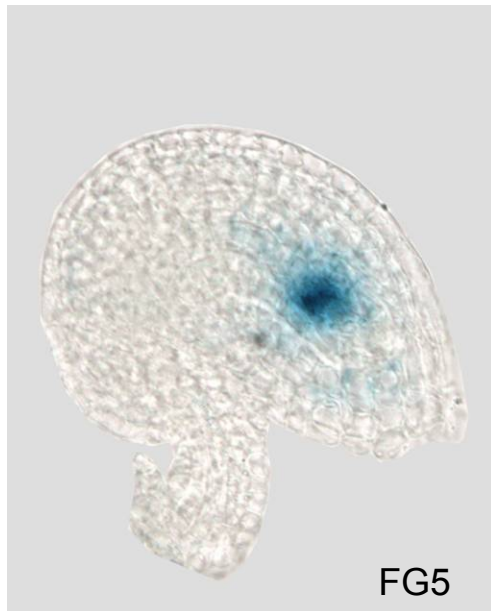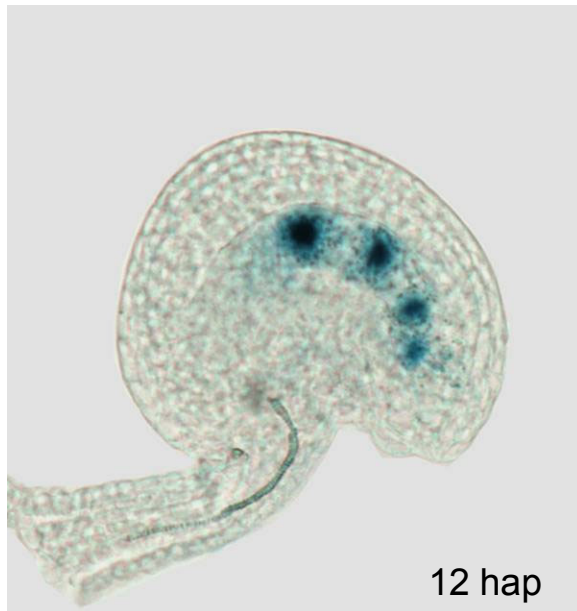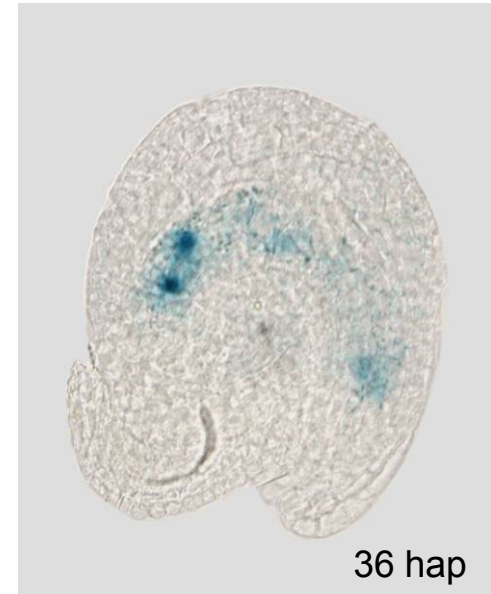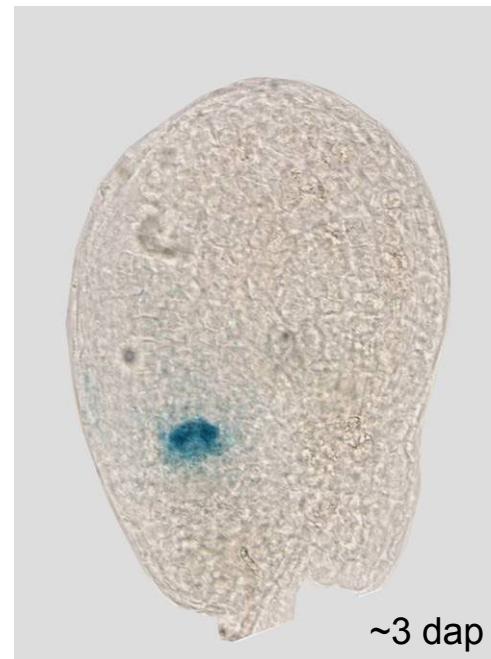



# AGL28 (1)

|                 |    |
|-----------------|----|
| #Lines analyzed | 17 |
| # Expressors    | 13 |

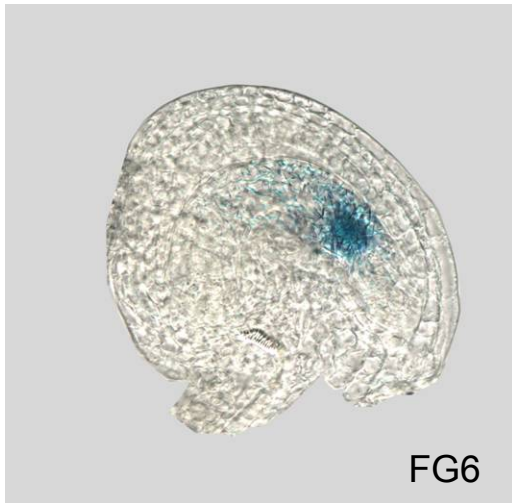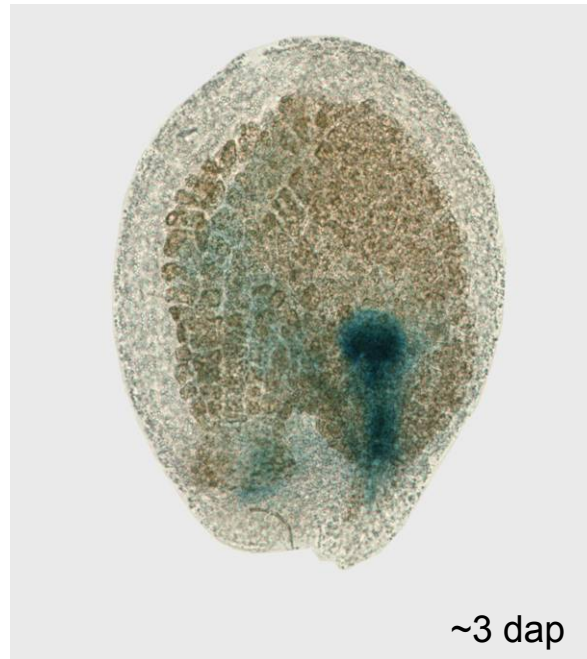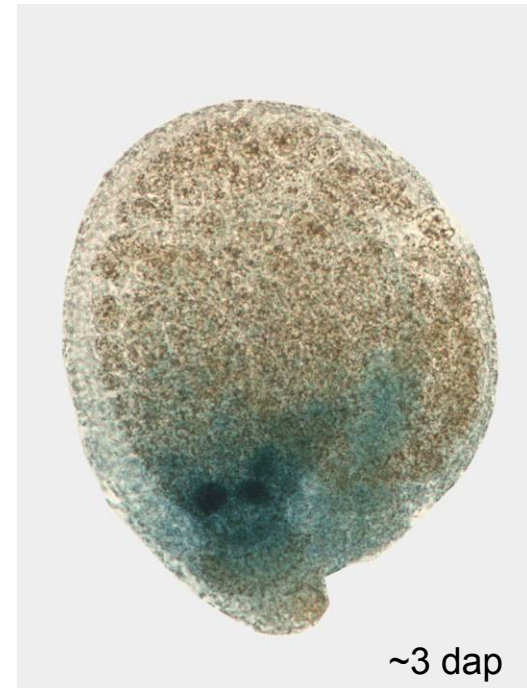

# AGL28 (2)

|                 |    |
|-----------------|----|
| #Lines analyzed | 17 |
| # Expressors    | 13 |

Mature embryo

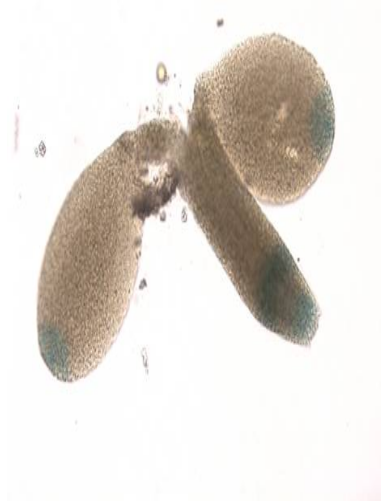

~3 week old seedling, root base

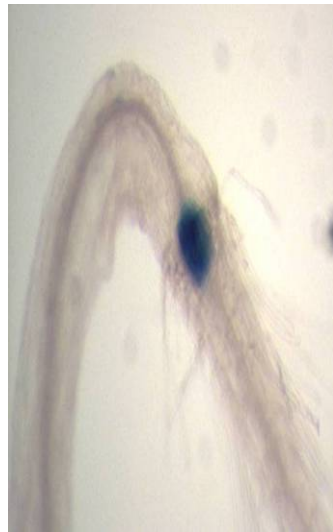

~3 week old seedling, leaves

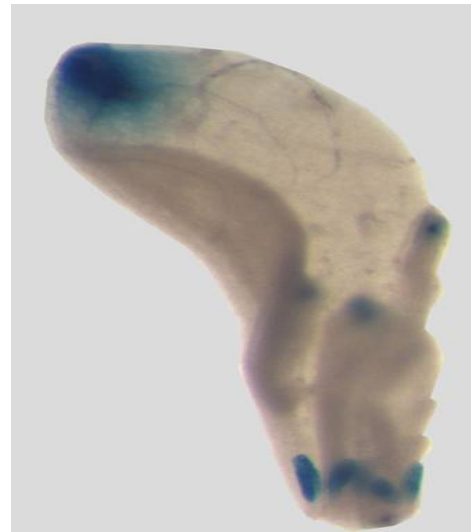

receptacle

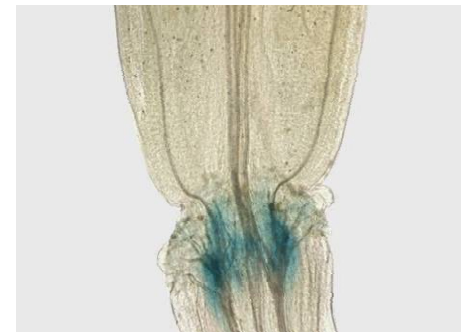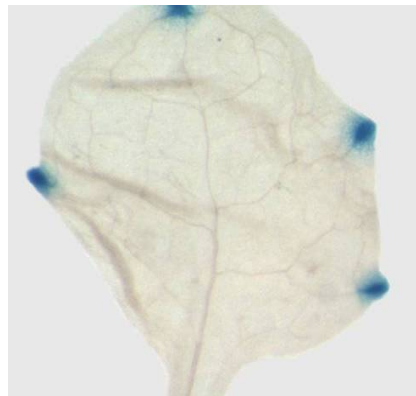

# DIANA

|                 |    |
|-----------------|----|
| #Lines analyzed | 52 |
| # Expressors    | 46 |

pAGL61::  
AGL61-  
GFP-GUS

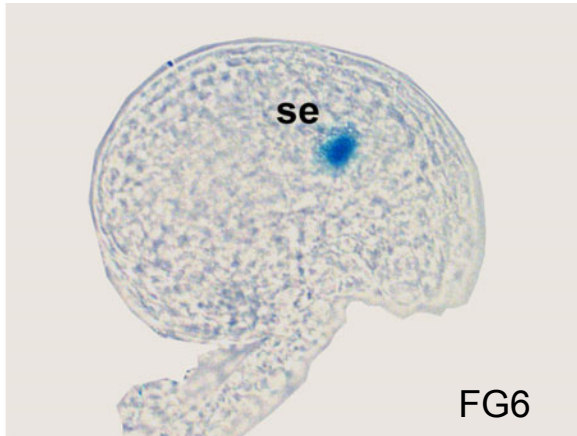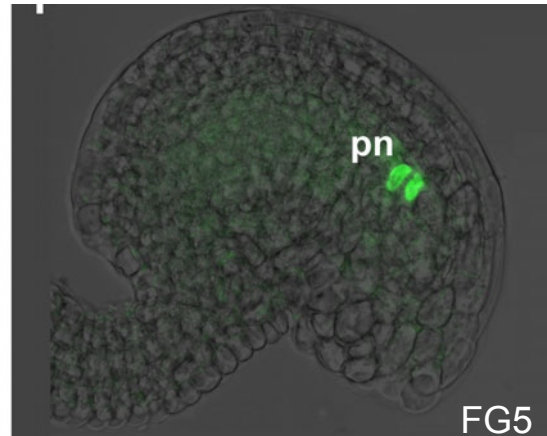

pAGL61::  
GFP-GUS

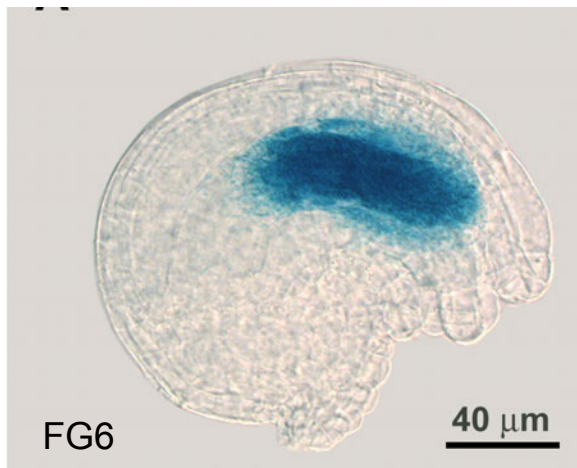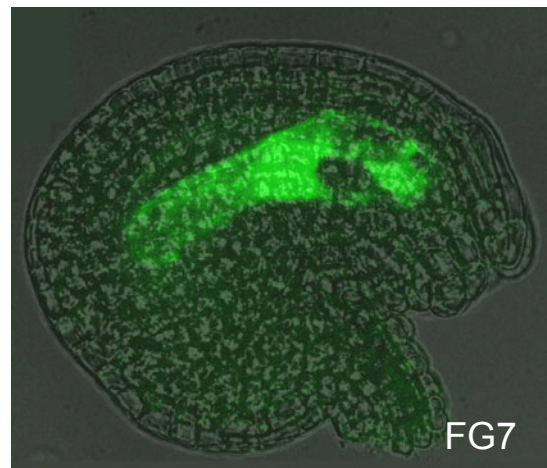

Filament of anther  
upon anthesis

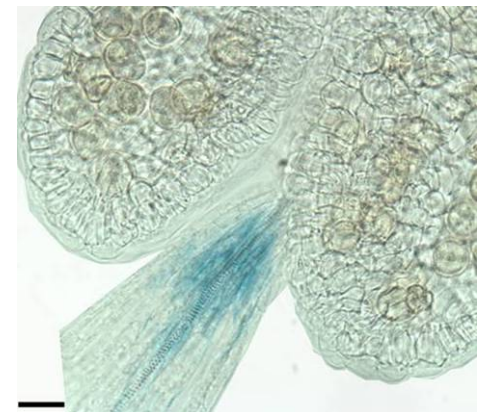

**Bemer M, Wolters-Arts M, Grossniklaus U, Angenent GC (2008)** The MADS domain protein DIANA acts together with AGAMOUS-LIKE80 to specify the central cell in Arabidopsis ovules. *Plant Cell* **20**: 2088-2101

# AGL62

|                 |    |
|-----------------|----|
| #Lines analyzed | 21 |
| # Expressors    | 16 |

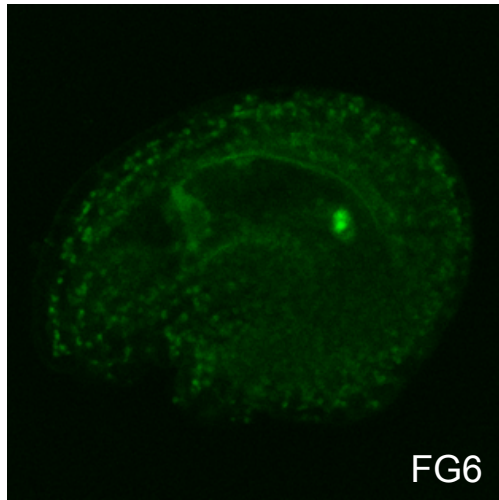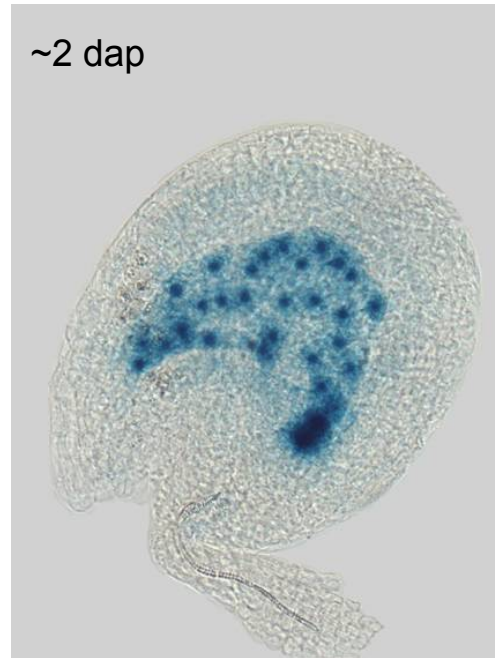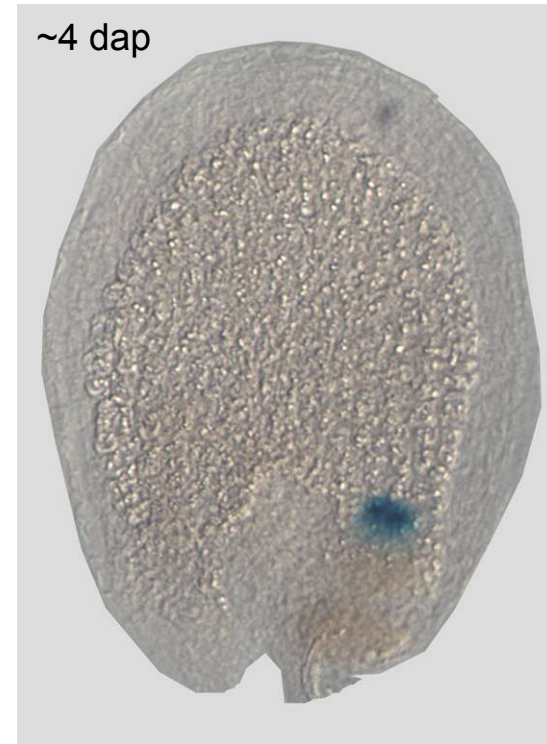



# AGL40

|                 |    |
|-----------------|----|
| #Lines analyzed | 26 |
| # Expressors    | 20 |

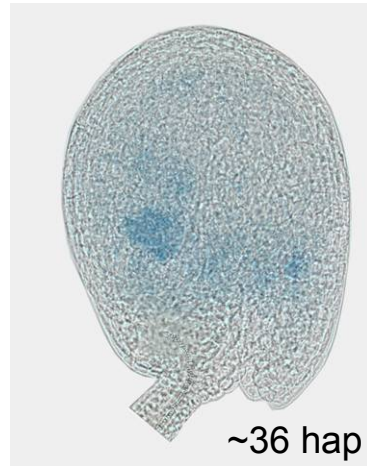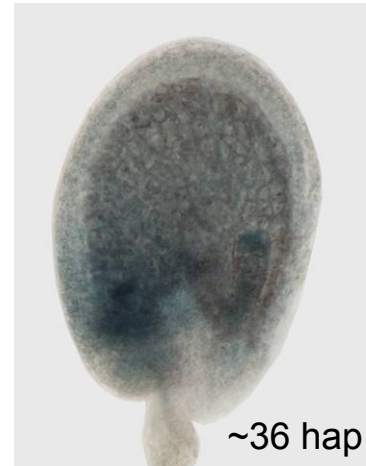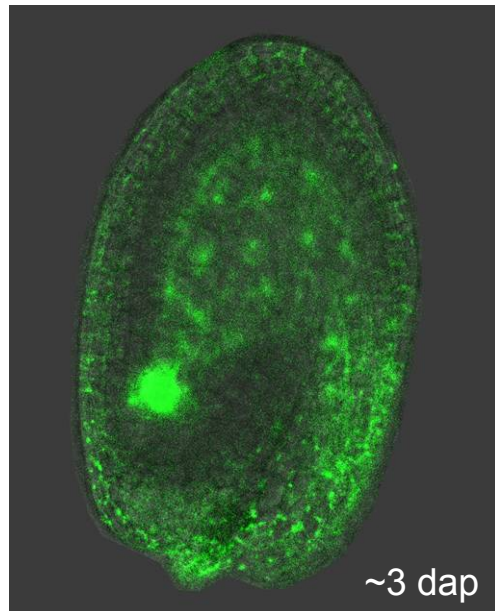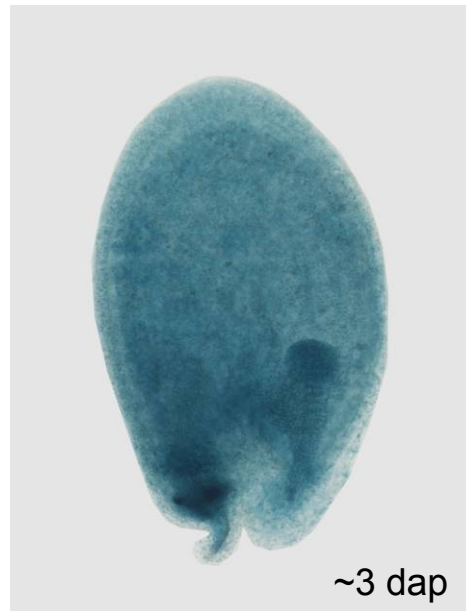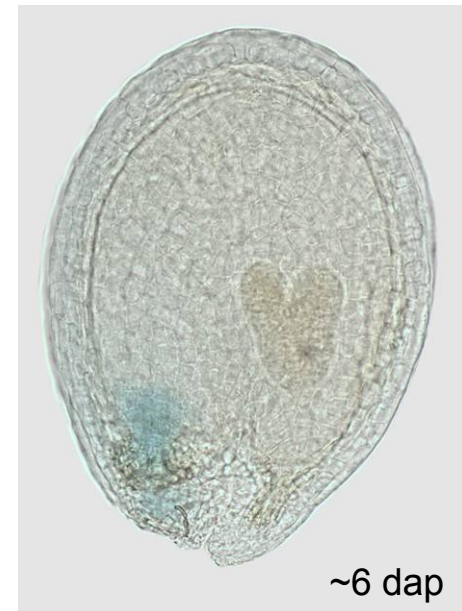

# AGL102

|                 |   |
|-----------------|---|
| #Lines analyzed | 6 |
| # Expressors    | 4 |

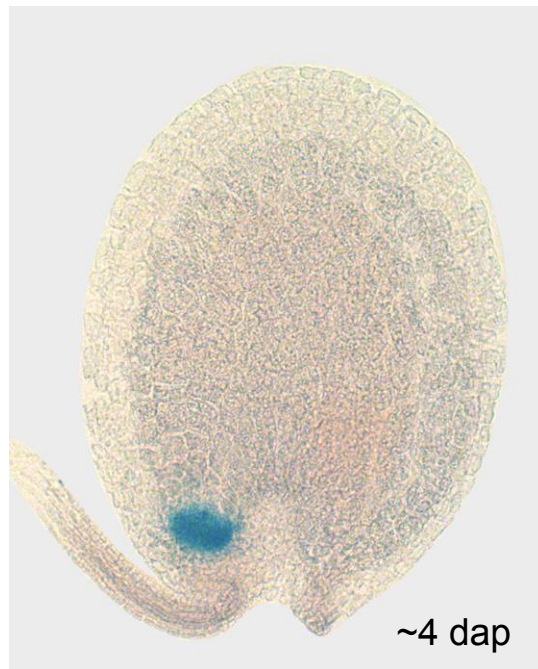

# AGL57

|                 |    |
|-----------------|----|
| #Lines analyzed | 24 |
| # Expressors    | 15 |

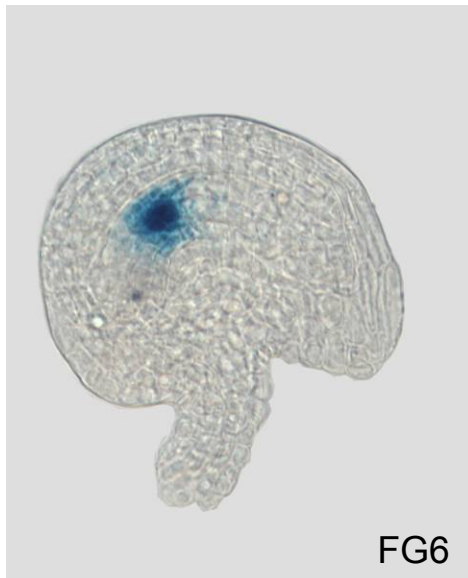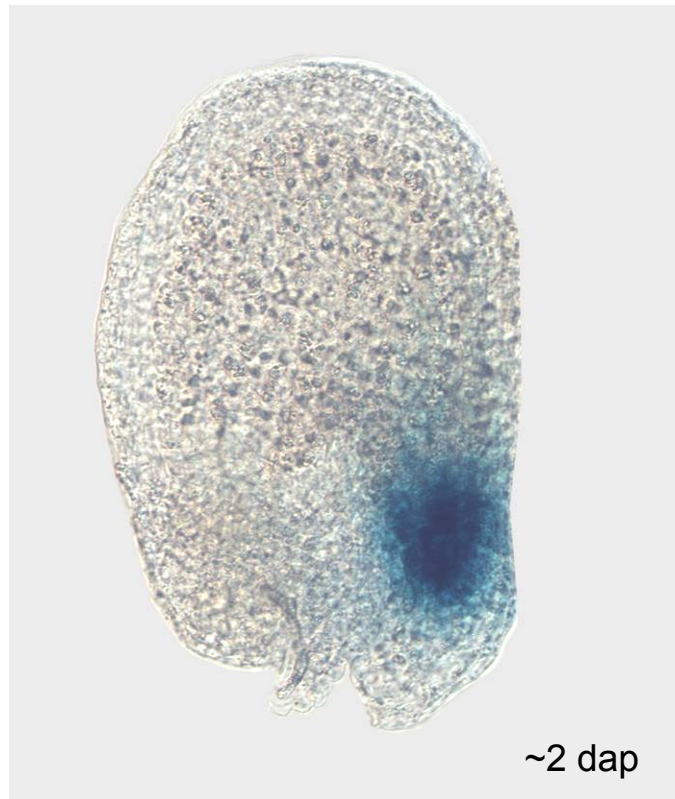

# AGL59

|                 |   |
|-----------------|---|
| #Lines analyzed | 3 |
| # Expressors    | 2 |

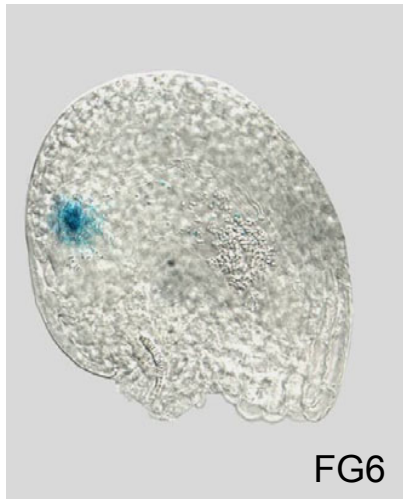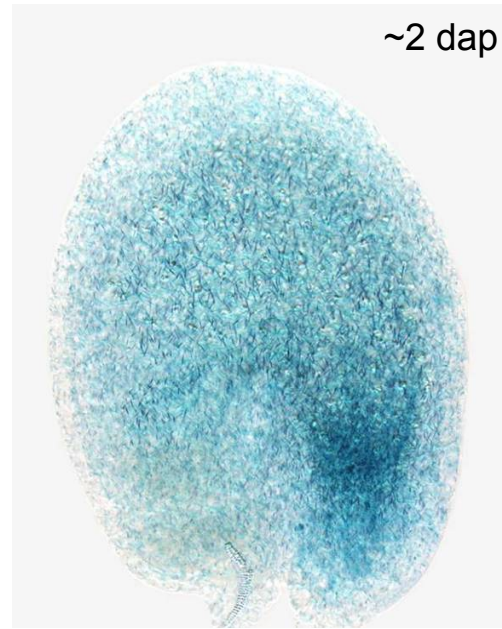



# AGL58

|                 |    |
|-----------------|----|
| #Lines analyzed | 16 |
| # Expressors    | 5  |

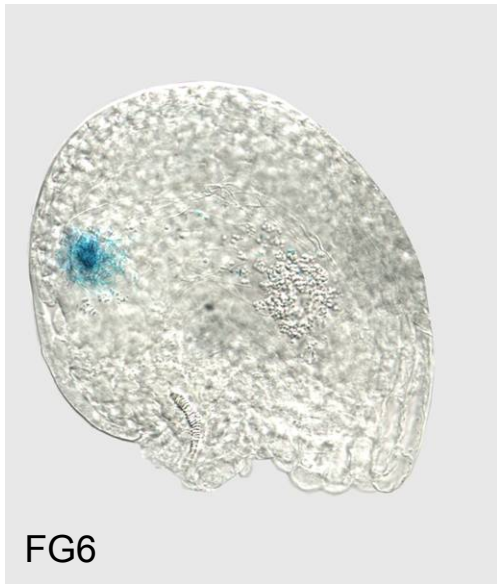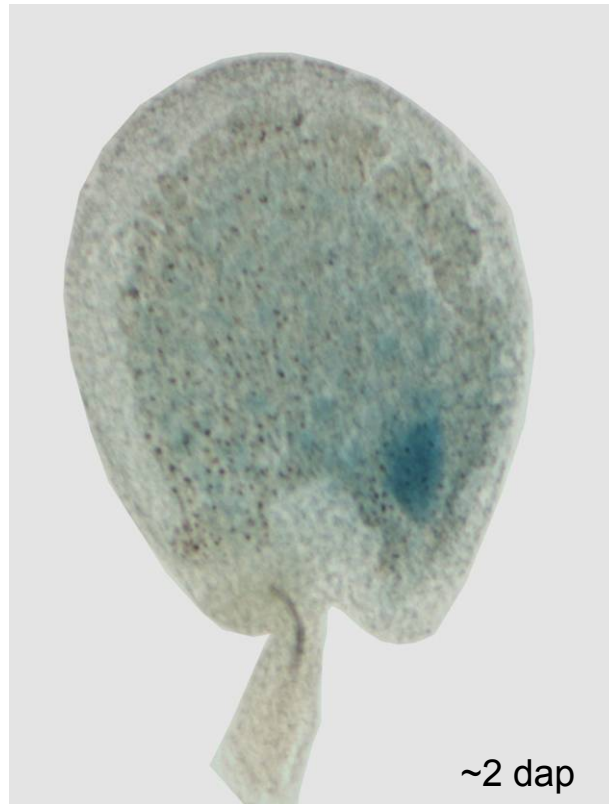

# AGL64

|                 |    |
|-----------------|----|
| #Lines analyzed | 15 |
| # Expressors    | 8  |

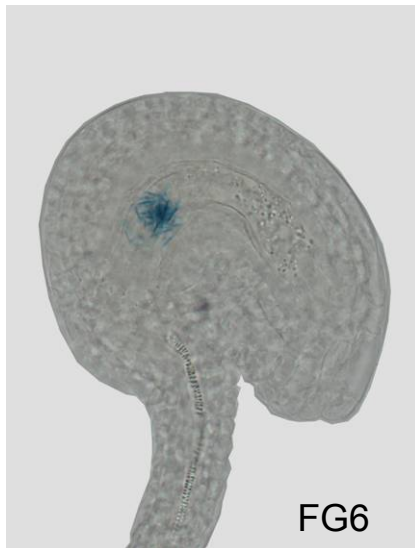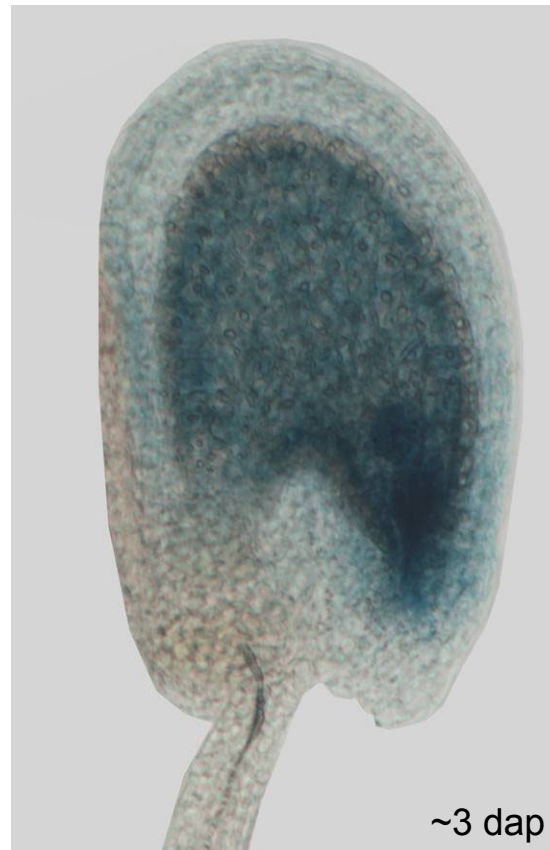

# AGL85

|                 |   |
|-----------------|---|
| #Lines analyzed | 9 |
| # Expressors    | 0 |

# AGL60

|                 |    |
|-----------------|----|
| #Lines analyzed | 23 |
| # Expressors    | 0  |



# AGL100

|                 |    |
|-----------------|----|
| #Lines analyzed | 25 |
| # Expressors    | 18 |

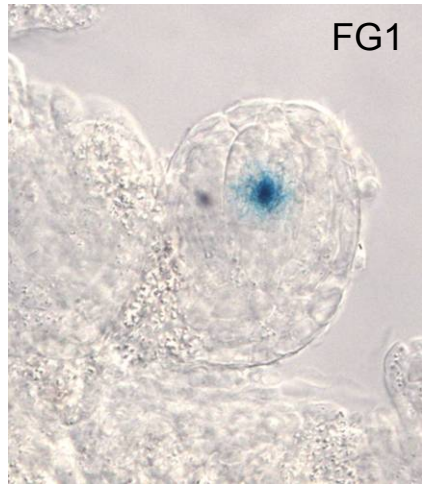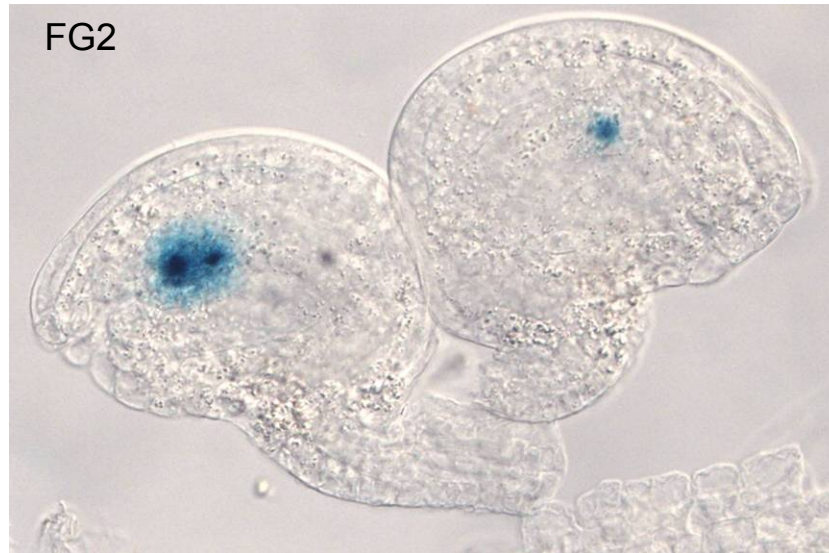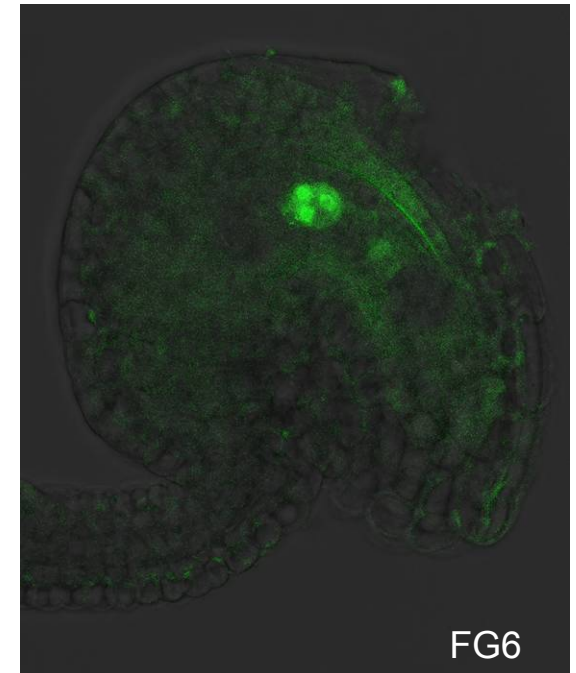

# AGL39

|                 |   |
|-----------------|---|
| #Lines analyzed | 8 |
| # Expressors    | 0 |

# AGL74

|                 |   |
|-----------------|---|
| #Lines analyzed | 9 |
| # Expressors    | 0 |

# AGL55

|                 |   |
|-----------------|---|
| #Lines analyzed | 9 |
| # Expressors    | 5 |

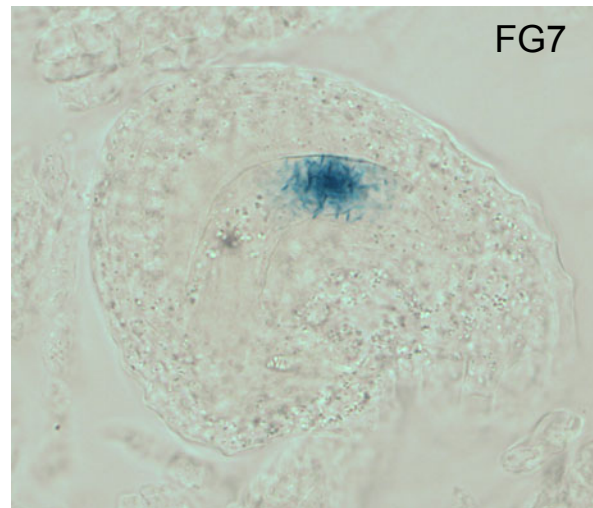



# AGL56

|                 |    |
|-----------------|----|
| #Lines analyzed | 25 |
| # Expressors    | 7  |

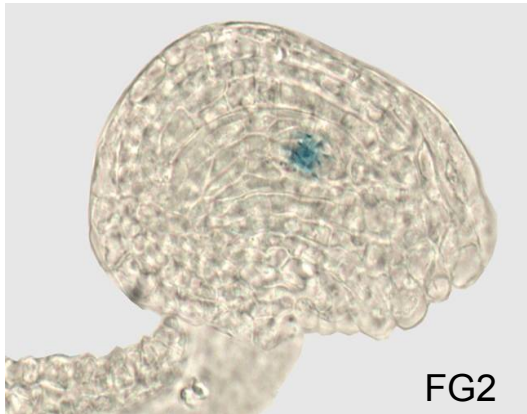

# AGL97

|                 |   |
|-----------------|---|
| #Lines analyzed | 6 |
| # Expressors    | 0 |

# AGL99

|                 |    |
|-----------------|----|
| #Lines analyzed | 23 |
| # Expressors    | 3  |

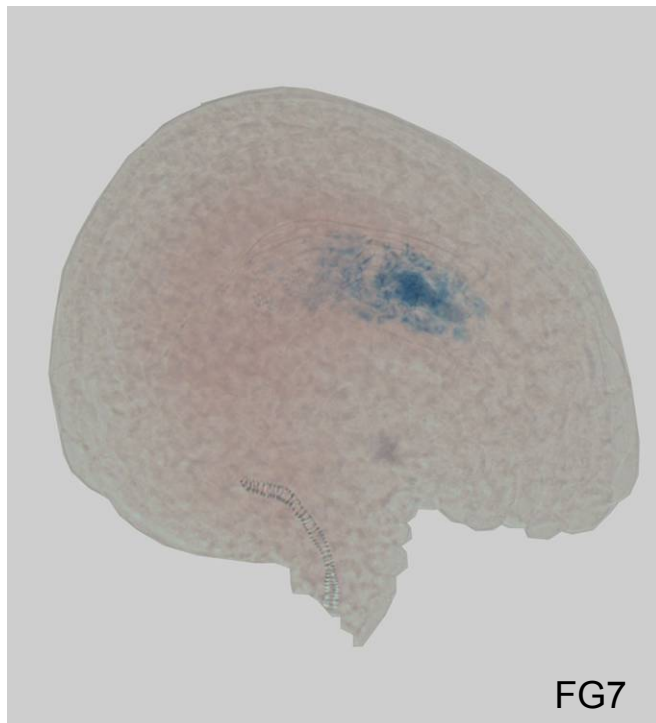

# AGL83

|                 |    |
|-----------------|----|
| #Lines analyzed | 22 |
| # Expressors    | 4  |

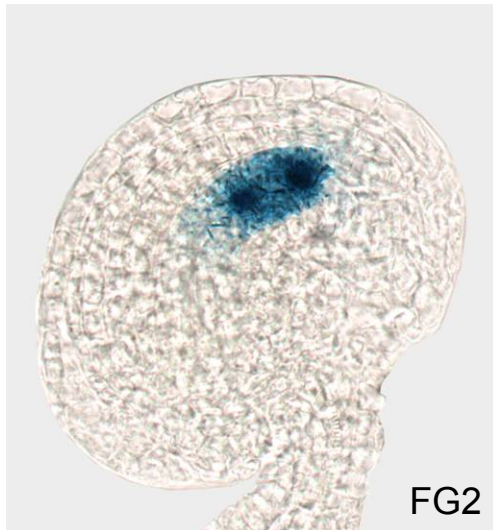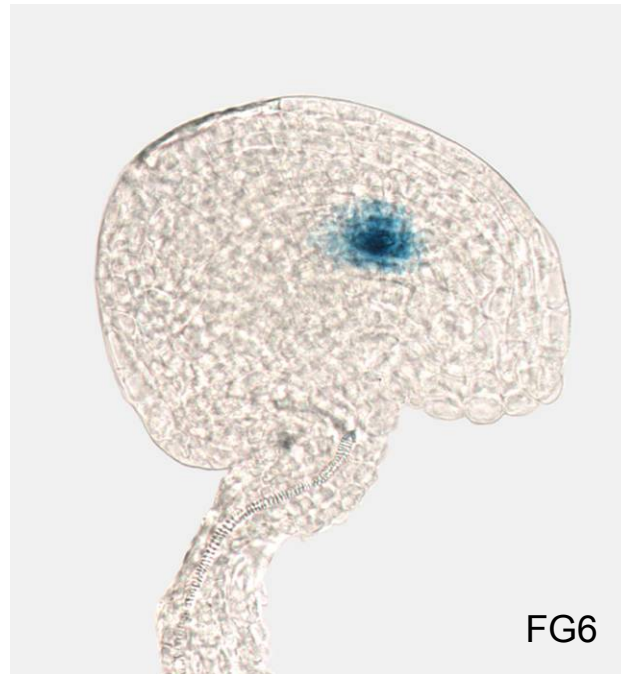



# AGL73

|                 |    |
|-----------------|----|
| #Lines analyzed | 13 |
| # Expressors    | 0  |

# AGL84

|                 |    |
|-----------------|----|
| #Lines analyzed | 21 |
| # Expressors    | 8  |

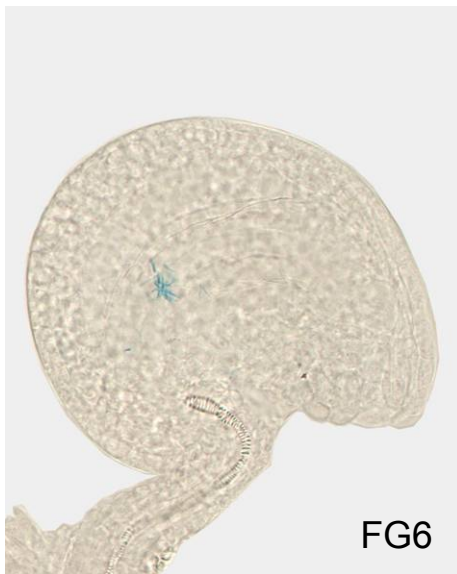

My-type genes

# AGL96

|                 |    |
|-----------------|----|
| #Lines analyzed | 17 |
| # Expressors    | 6  |

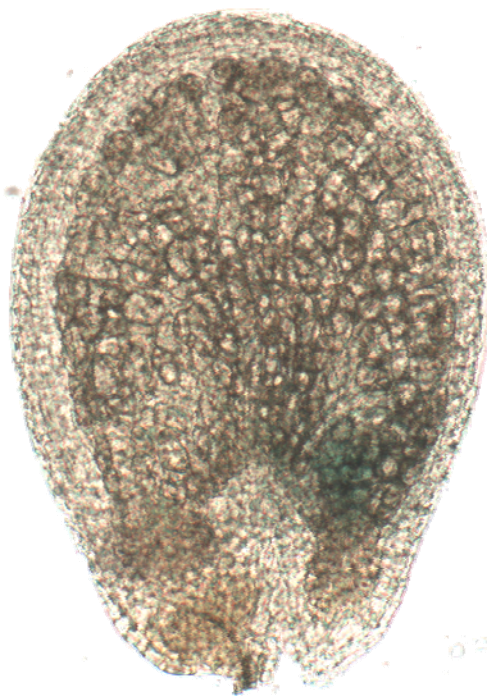

~2 dap

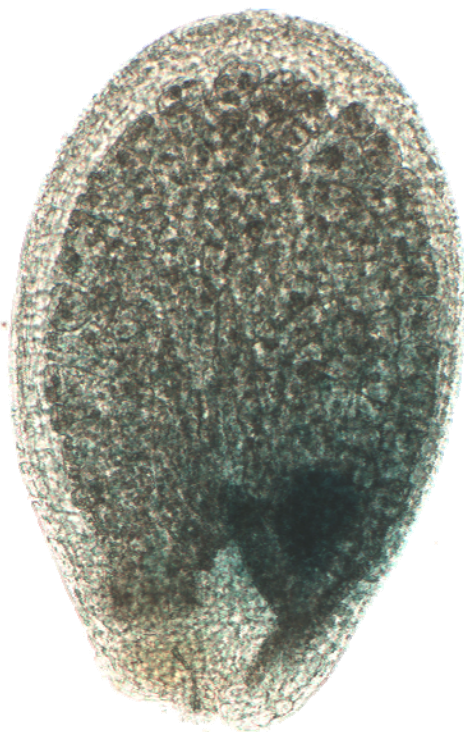

~3 dap

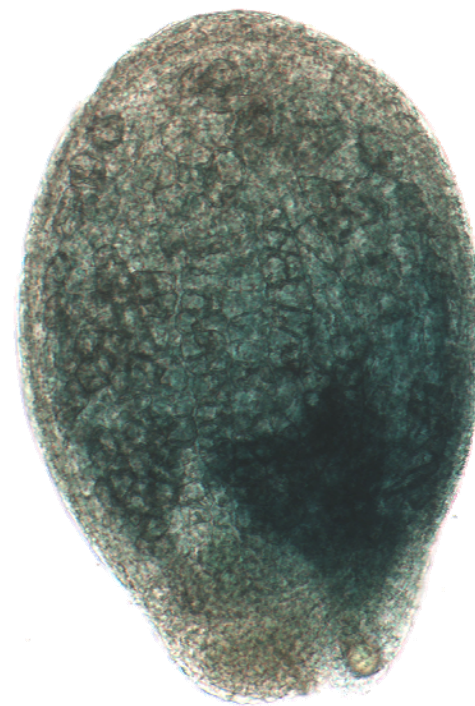

~5 dap

# AGL41

|                 |    |
|-----------------|----|
| #Lines analyzed | 17 |
| # Expressors    | 0  |

# AGL95

|                 |    |
|-----------------|----|
| #Lines analyzed | 17 |
| # Expressors    | 0  |



# AGL48

|                 |    |
|-----------------|----|
| #Lines analyzed | 17 |
| # Expressors    | 10 |

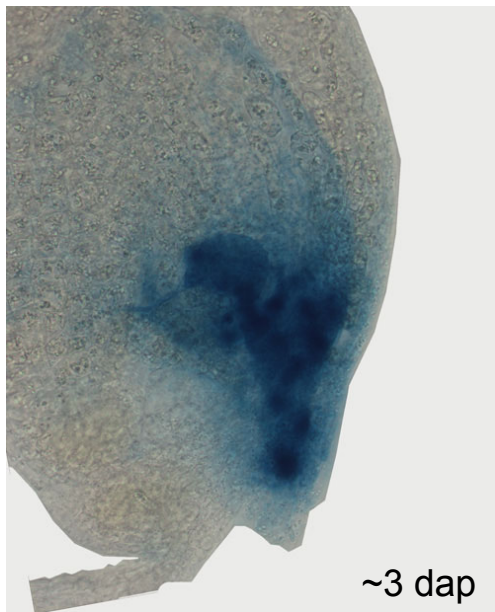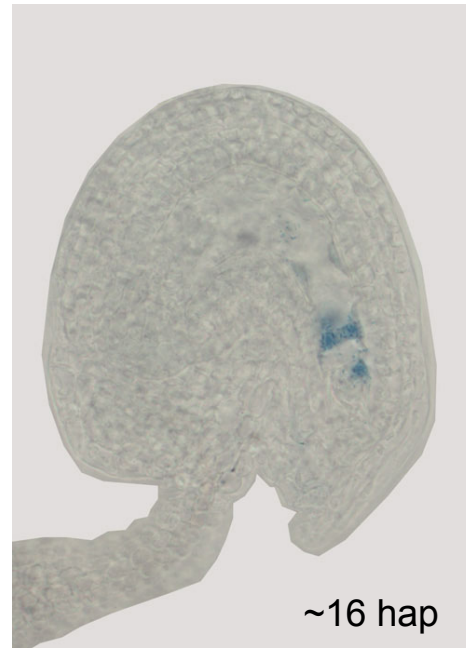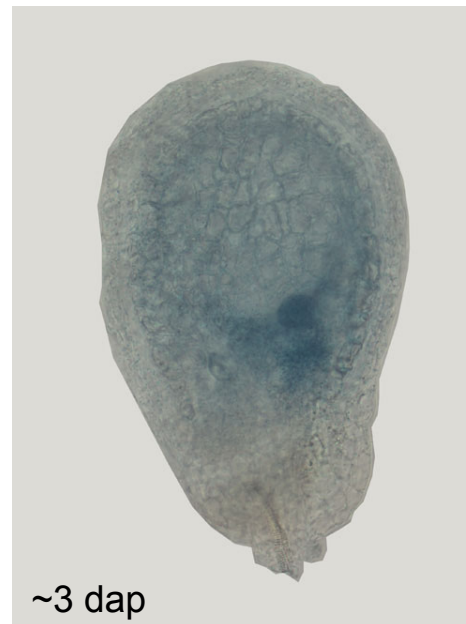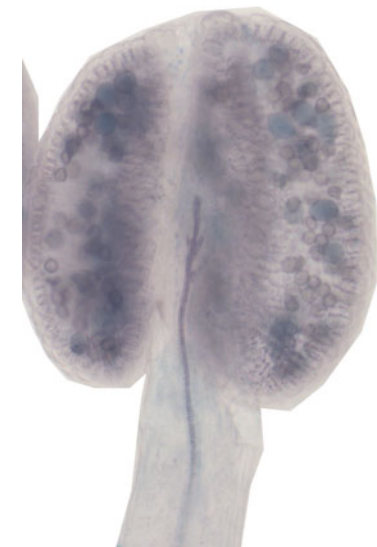

anther upon anthesis

# AGL87

|                 |   |
|-----------------|---|
| #Lines analyzed | 0 |
| # Expressors    | 0 |

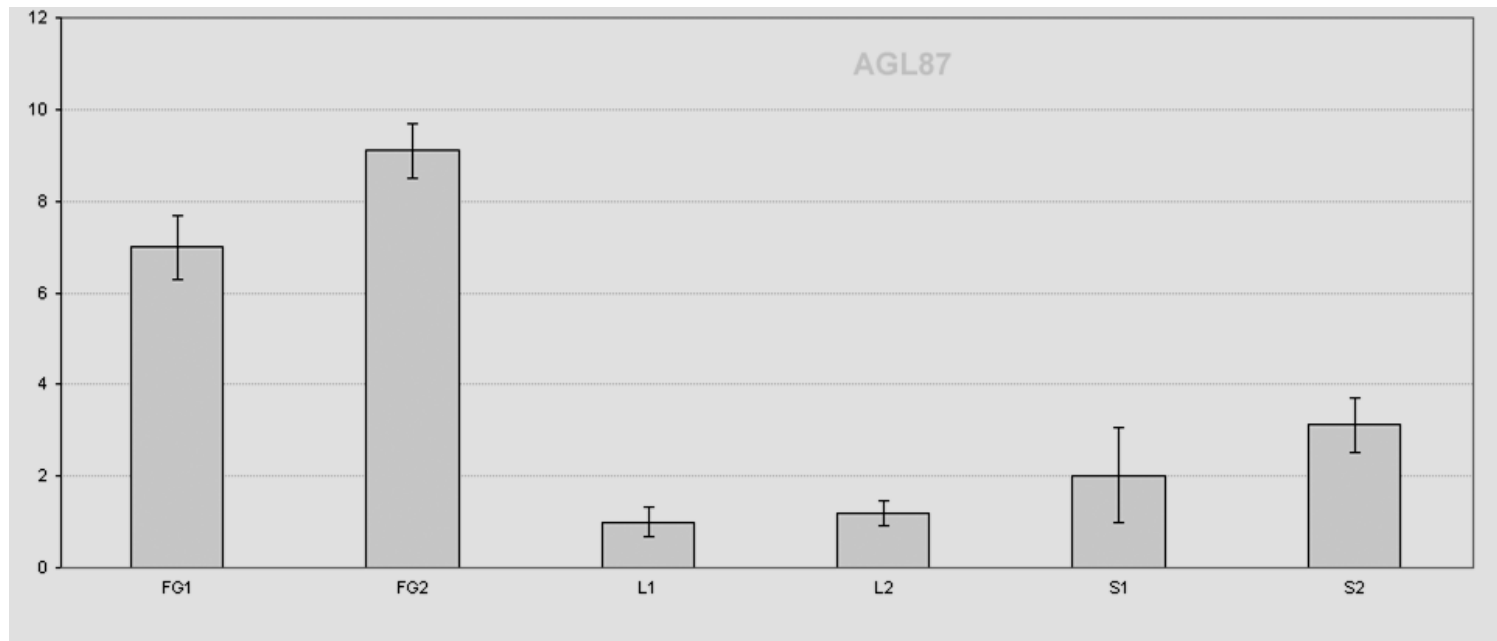

# AGL46

|                 |   |
|-----------------|---|
| #Lines analyzed | 7 |
| # Expressors    | 4 |

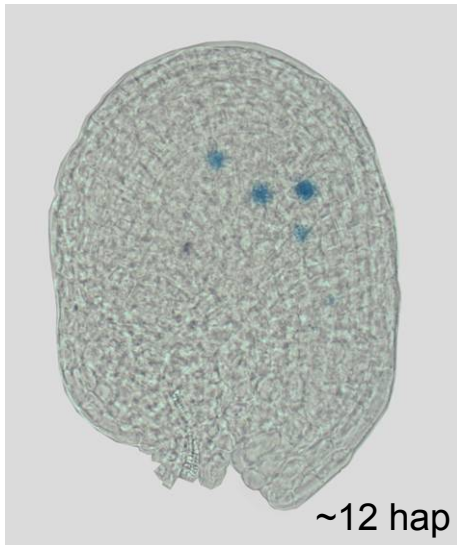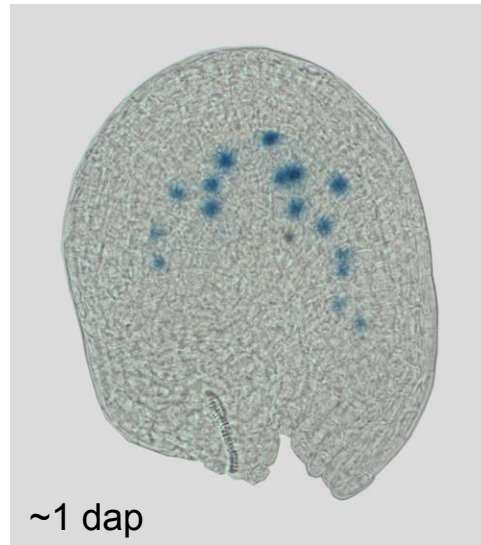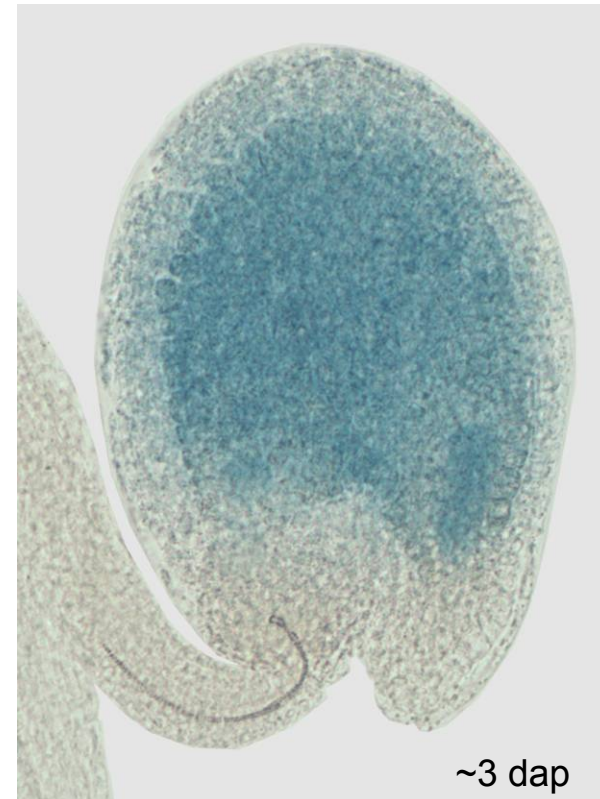

# AGL45

|                 |   |
|-----------------|---|
| #Lines analyzed | 5 |
| # Expressors    | 3 |

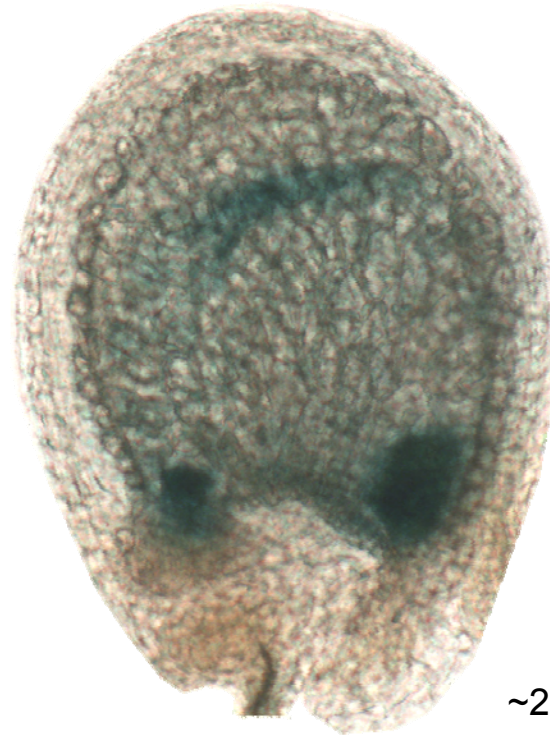

~2 dap

# AGL80

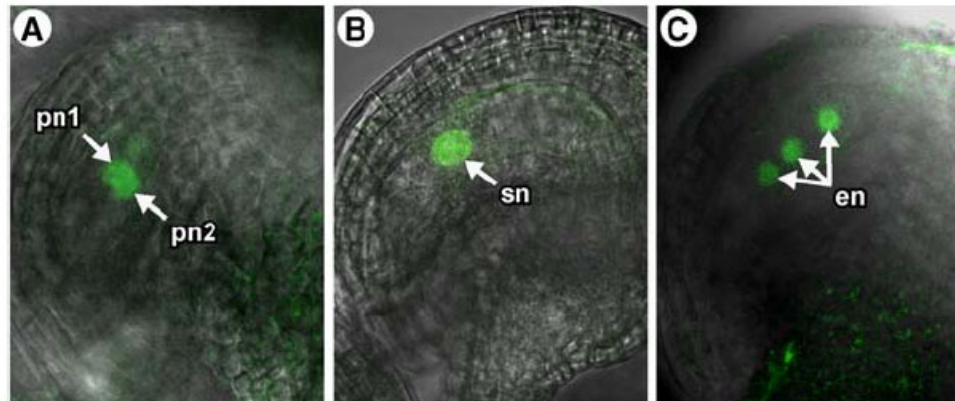

**Figure 4.** *AGL80-GFP* Expression.

**(A)** Expression of *AGL80-GFP* in female gametophytes before fusion of the polar nuclei (late stage FG5). Expression is detected only in the two polar nuclei.

**(B)** Expression of *AGL80-GFP* in female gametophytes at the terminal developmental stage (stage FG7). Expression is detected only in the secondary nucleus.

**(C)** Expression of *AGL80-GFP* in a fertilized female gametophyte at 18 h after pollination. Expression is detected only in the endosperm nuclei. Only three of the four endosperm nuclei can be seen in this focal plane.

All images are composites of CLSM micrographs of *AGL80-GFP* expression merged with bright-field images of ovules. en, endosperm nuclei; pn1 and pn2, the two polar nuclei before fusion; sn, secondary nucleus of the central cell.

**Portereiko, M.F., Lloyd, A., Steffen, J.G., Punwani, J.A., Otsuga, D., and Drews, G.N. (2006). *AGL80* Is Required for Central Cell and Endosperm Development in *Arabidopsis*. *The Plant Cell* **18**, 1862-1872**

# AGL35

|                 |    |
|-----------------|----|
| #Lines analyzed | 17 |
| # Expressors    | 12 |

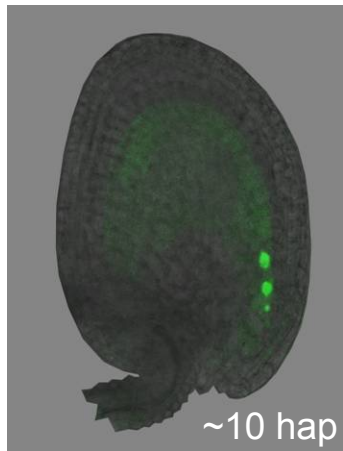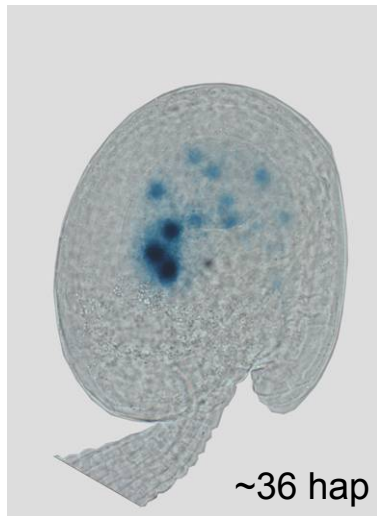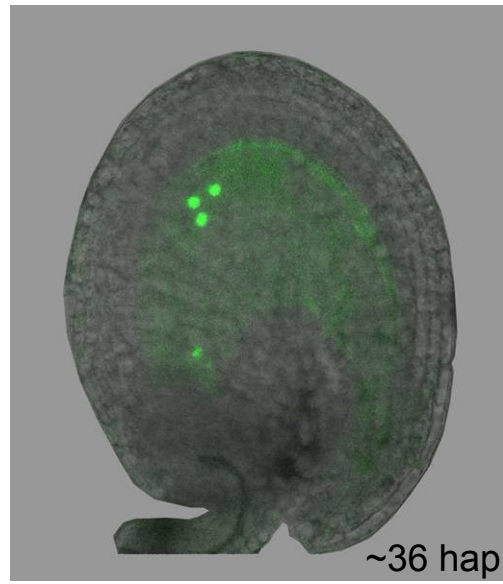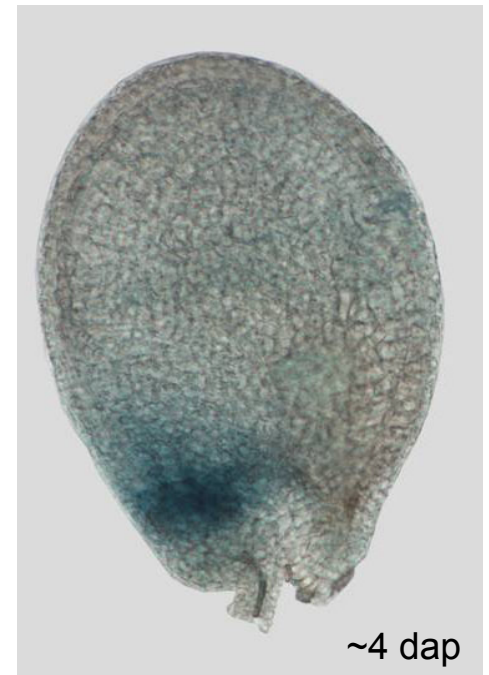



# AGL38

|                 |    |
|-----------------|----|
| #Lines analyzed | 16 |
| # Expressors    | 12 |

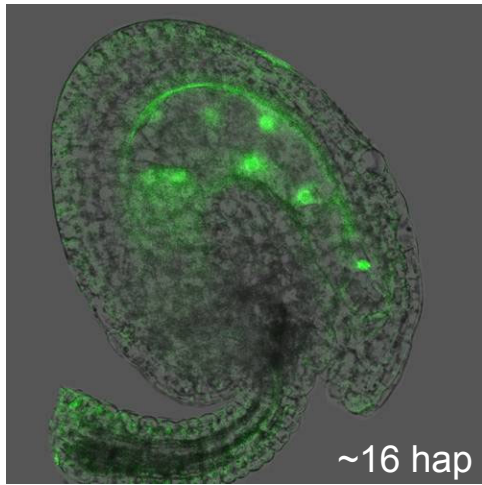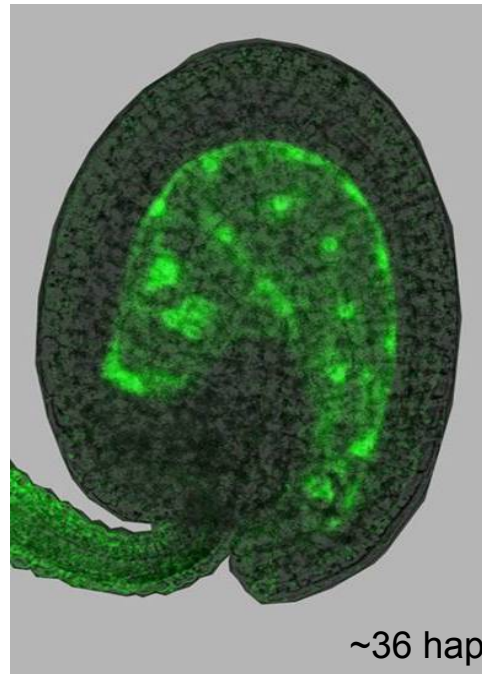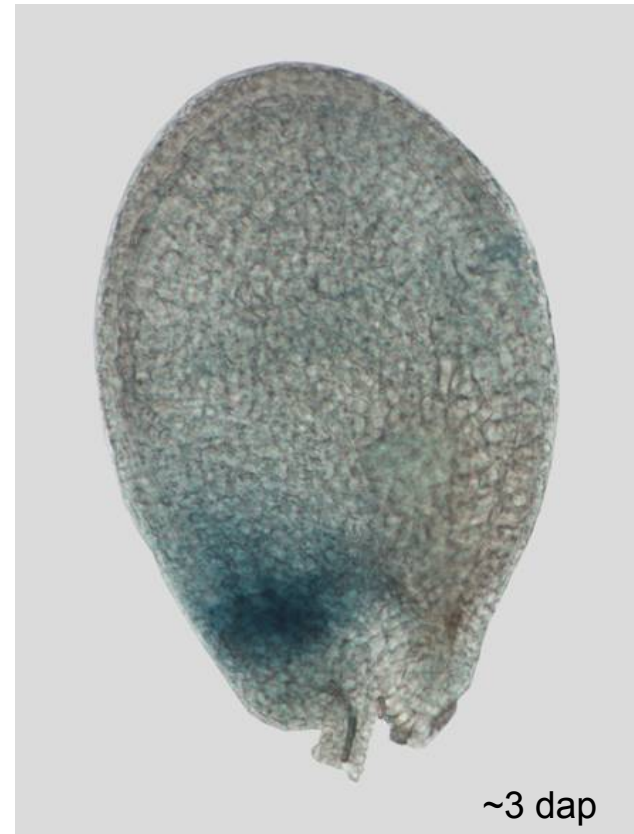

# AGL37

|                 |    |
|-----------------|----|
| #Lines analyzed | 18 |
| # Expressors    | 13 |

pollinated pistil

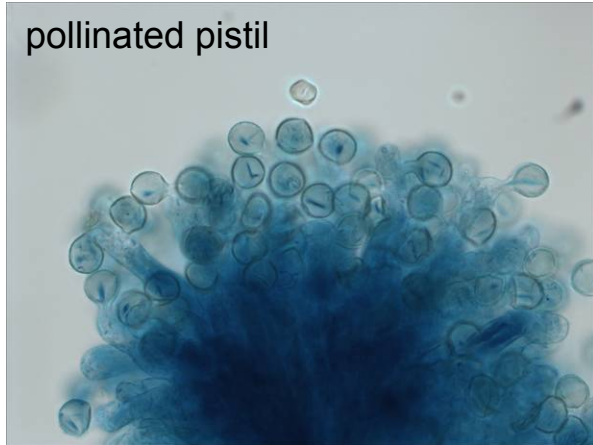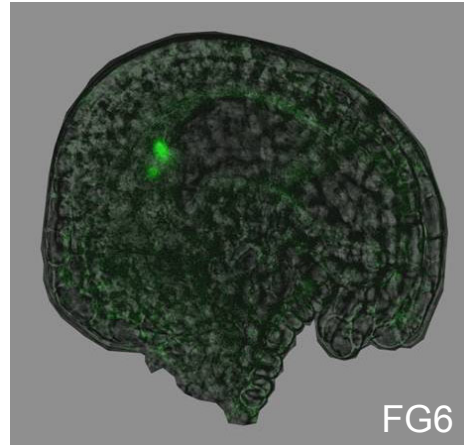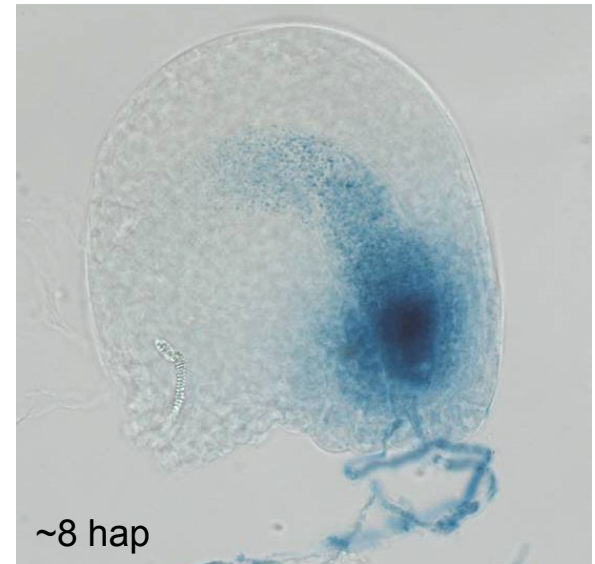

~8 hap

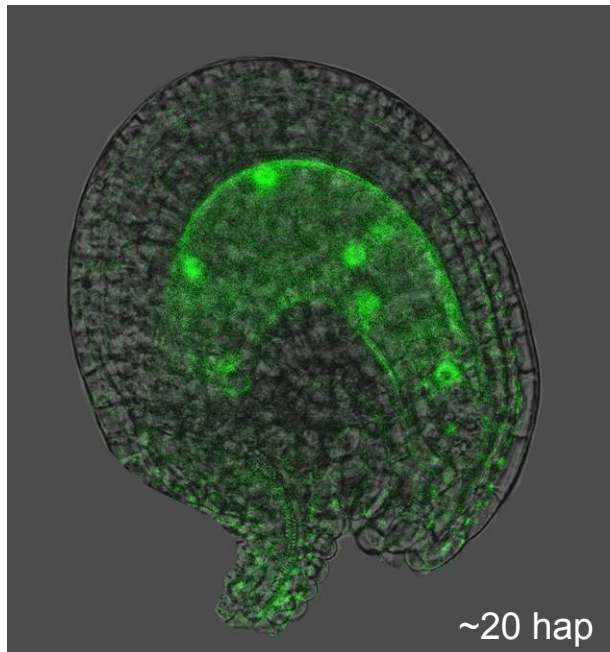

~20 hap

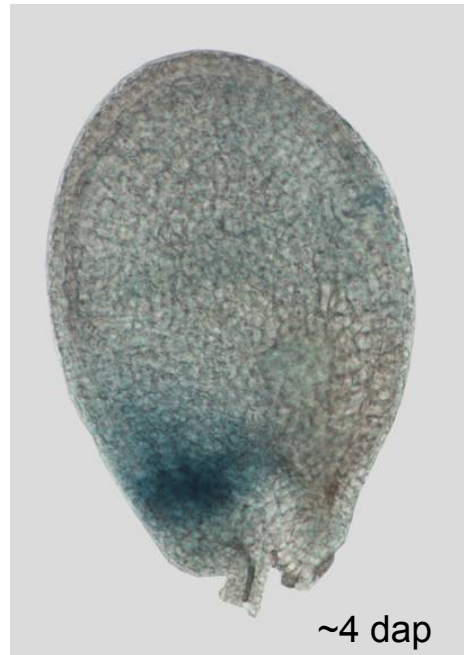

~4 dap

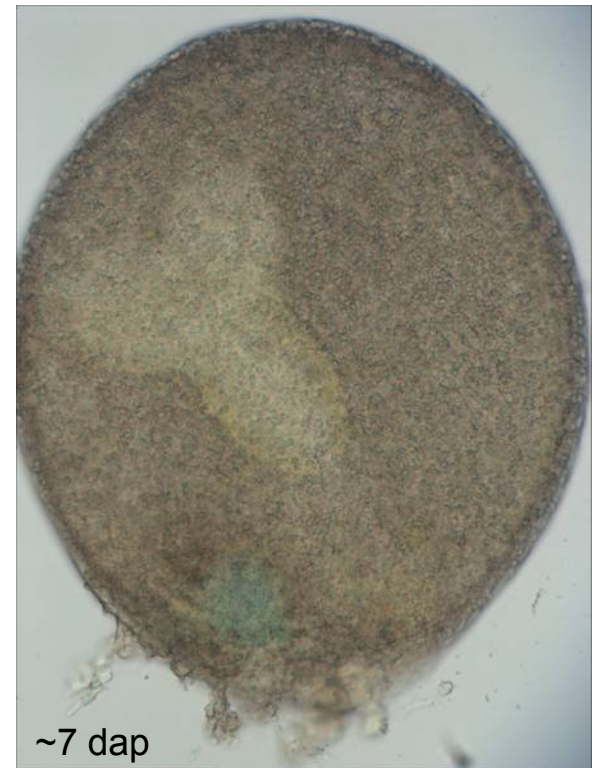

~7 dap

# AGL92

|                 |    |
|-----------------|----|
| #Lines analyzed | 17 |
| # Expressors    | 0  |

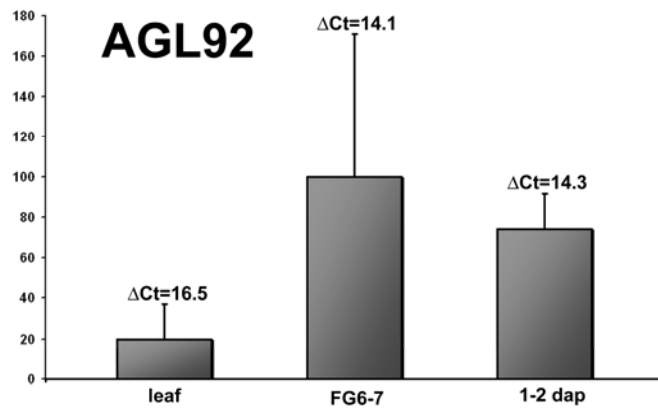

Average of two biological and two technical replicas.

Ct values are very low: hardly expressed

# AGL86

|                       |    |
|-----------------------|----|
| #Lines analyzed       | 24 |
| # Expressors (pollen) | 23 |

|                                 |    |
|---------------------------------|----|
| #Lines analyzed pAGL86::GFP-GUS | 26 |
| # Expressors (visible in seed)  | 6  |

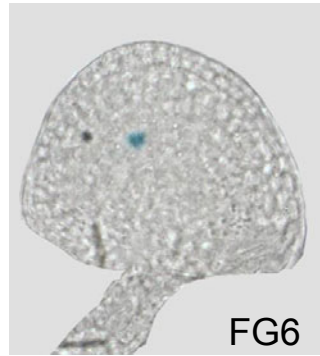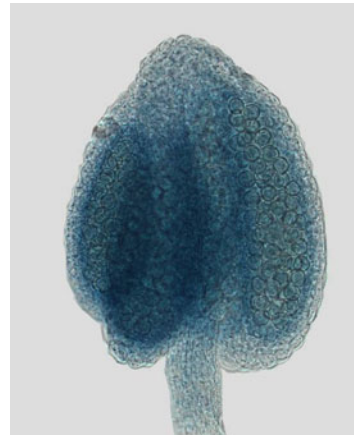

anther

pAGL86::AGL86-GFP-GUS

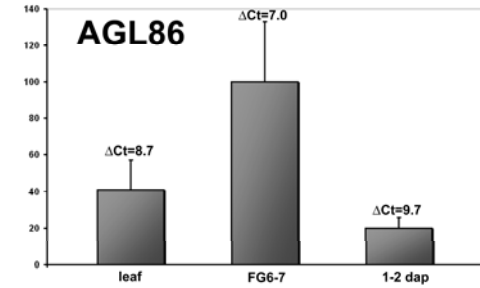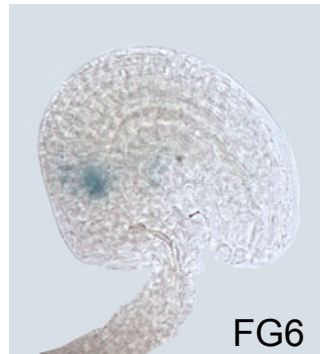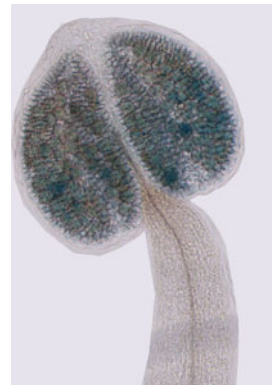

anther

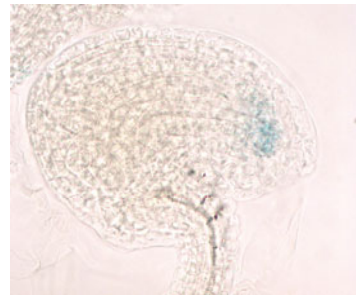

pollinated embryo sac

pAGL86::GFP-GUS

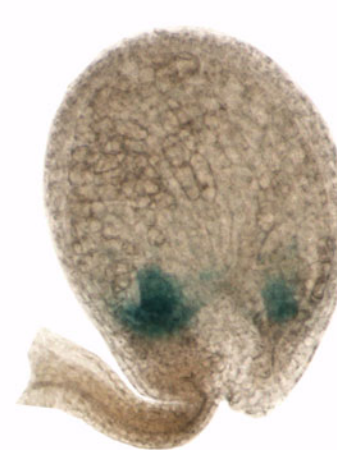

~3 dap

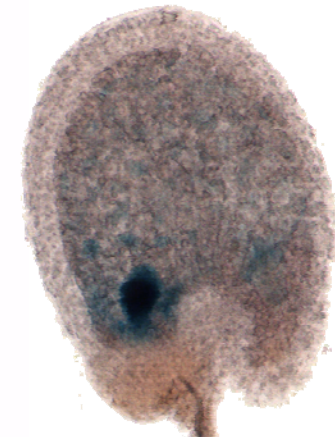

~3 dap

# AGL36

|                 |    |
|-----------------|----|
| #Lines analyzed | 17 |
| # Expressors    | 0  |

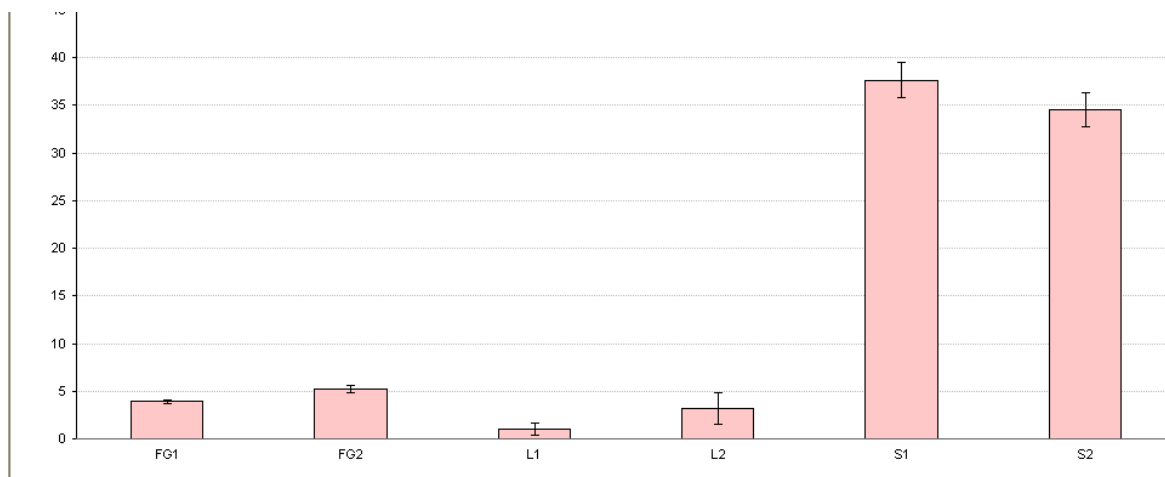

# AGL34

|                 |    |
|-----------------|----|
| #Lines analyzed | 17 |
| # Expressors    | 0  |

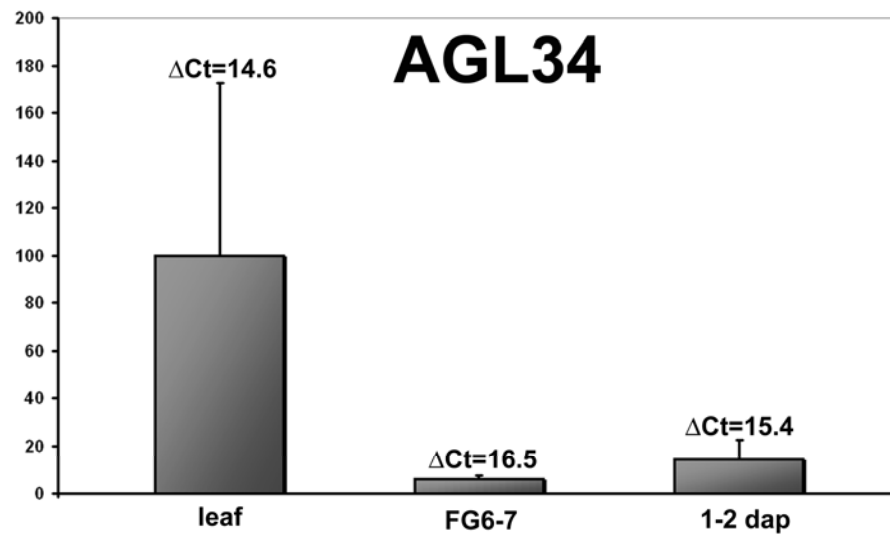

# AGL90

|                 |    |
|-----------------|----|
| #Lines analyzed | 17 |
| # Expressors    | 0  |

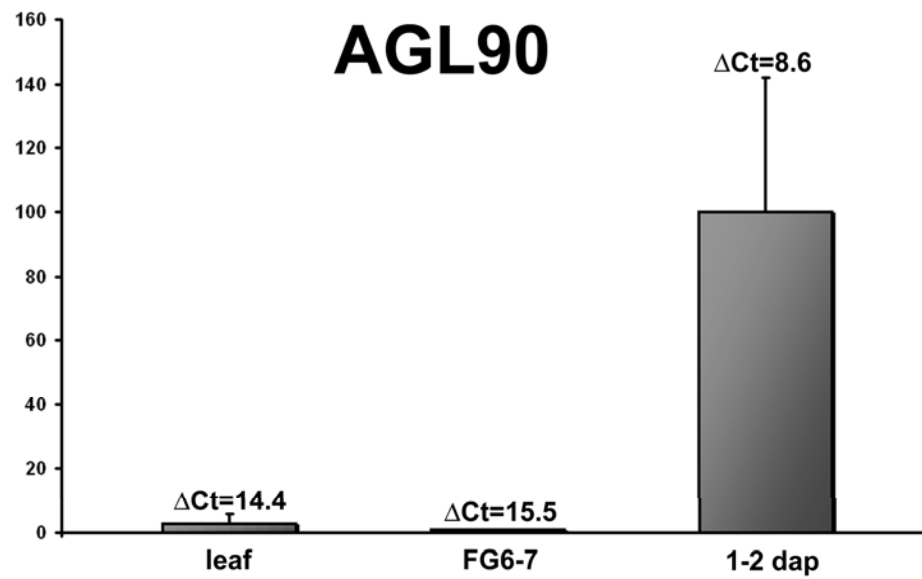



Mβ-type genes

# AGL82

|                 |    |
|-----------------|----|
| #Lines analyzed | 20 |
| # Expressors    | 10 |

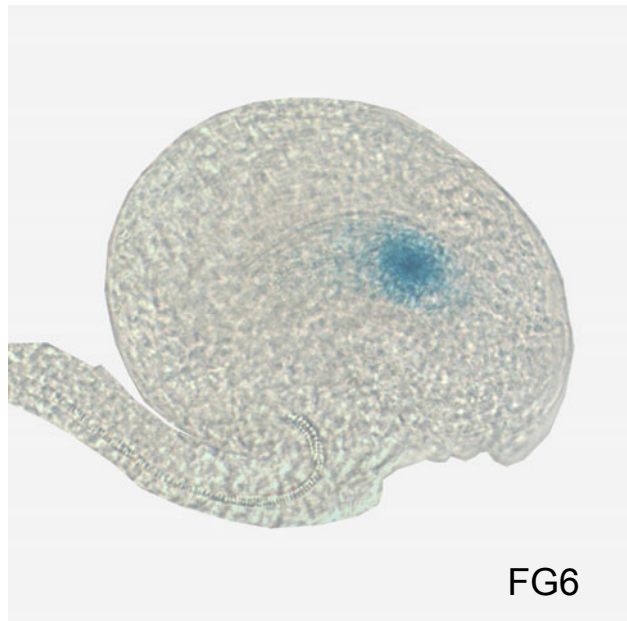

# AGL47

|                 |    |
|-----------------|----|
| #Lines analyzed | 14 |
| # Expressors    | 8  |

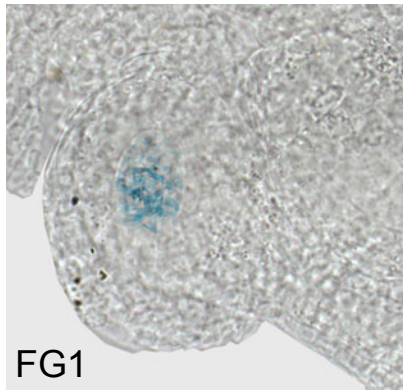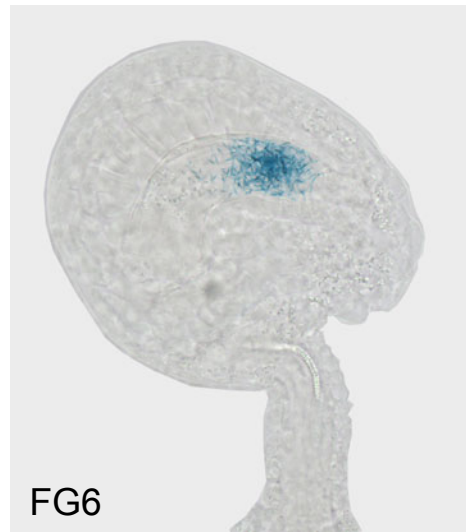

# AGL49

|                 |    |
|-----------------|----|
| #Lines analyzed | 17 |
| # Expressors    | 3  |

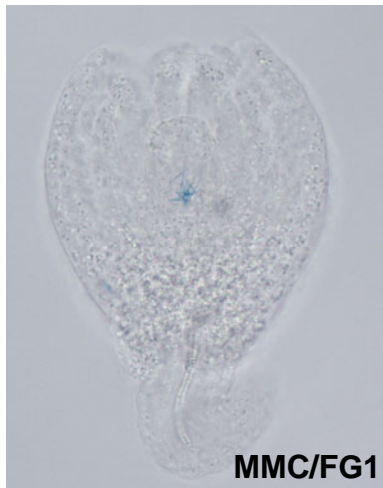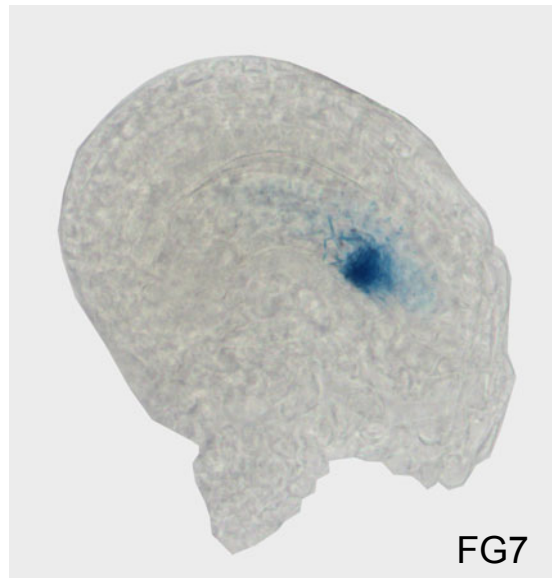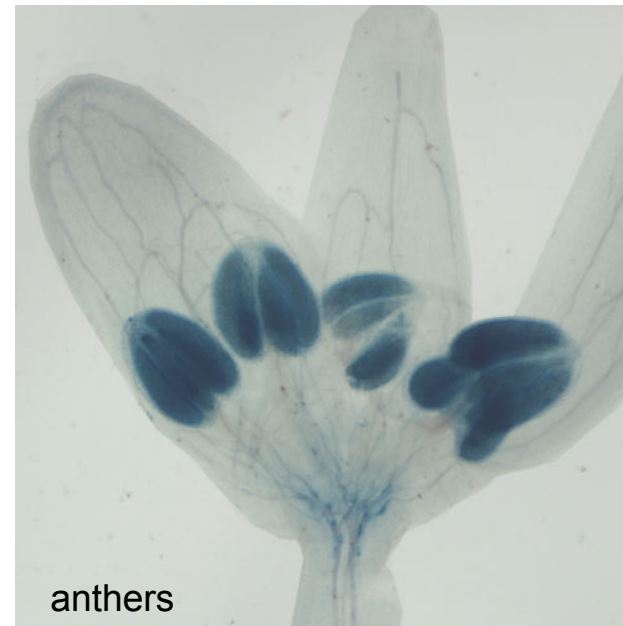

# AGL50

|                 |    |
|-----------------|----|
| #Lines analyzed | 11 |
| # Expressors    | 0  |

# AGL103

|                 |    |
|-----------------|----|
| #Lines analyzed | 17 |
| # Expressors    | 1  |

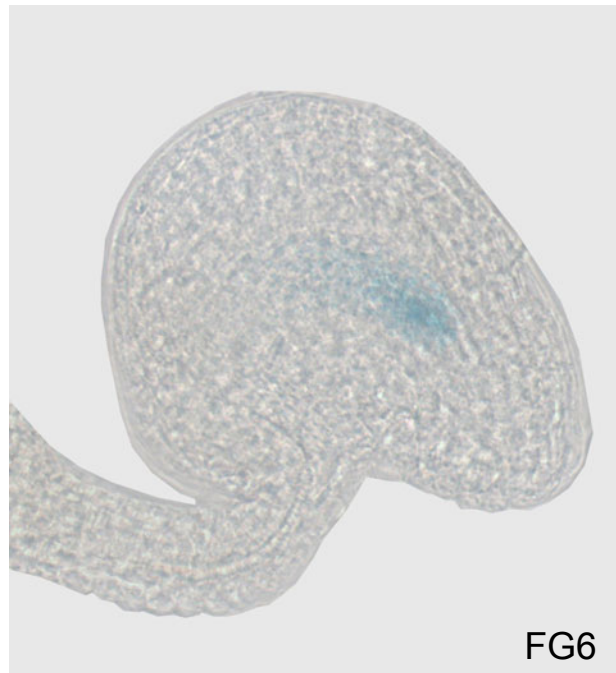

# AGL101

|                 |    |
|-----------------|----|
| #Lines analyzed | 17 |
| # Expressors    | 0  |



# AGL26

|                 |    |
|-----------------|----|
| #Lines analyzed | 17 |
| # Expressors    | 0  |

# AGL89

|                 |    |
|-----------------|----|
| #Lines analyzed | 16 |
| # Expressors    | 2  |

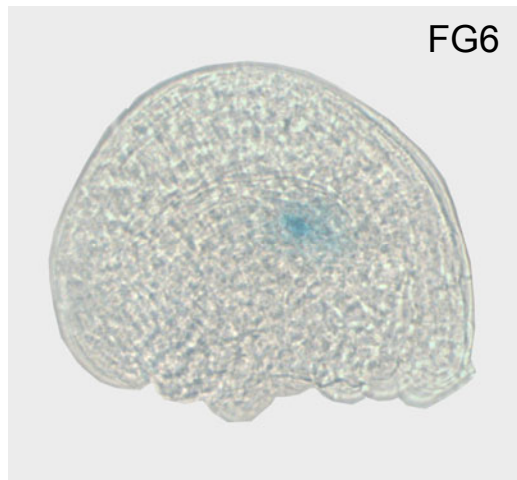

# AGL54

|                 |    |
|-----------------|----|
| #Lines analyzed | 17 |
| # Expressors    | 7  |

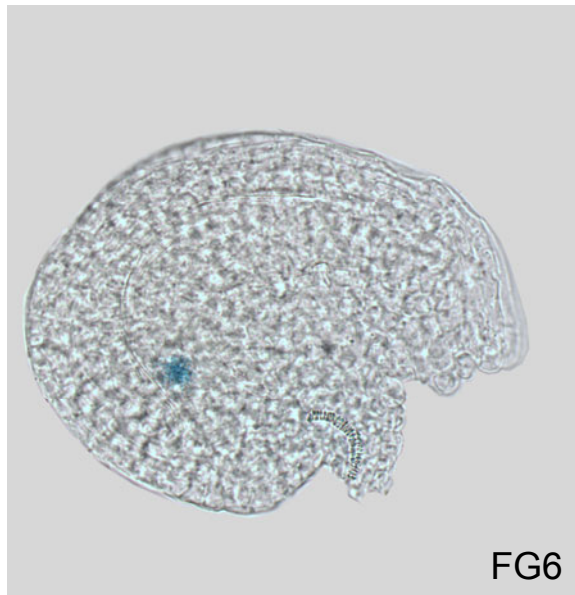

# AGL53

|                 |    |
|-----------------|----|
| #Lines analyzed | 17 |
| # Expressors    | 12 |

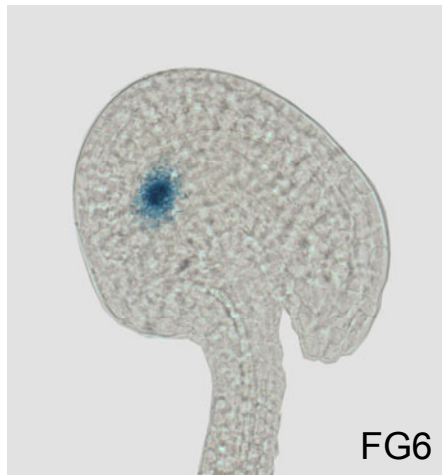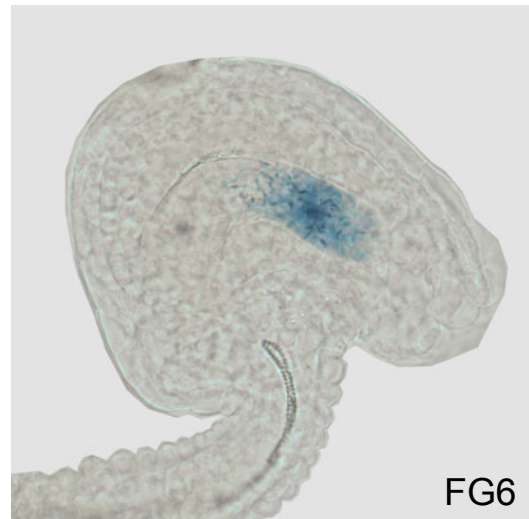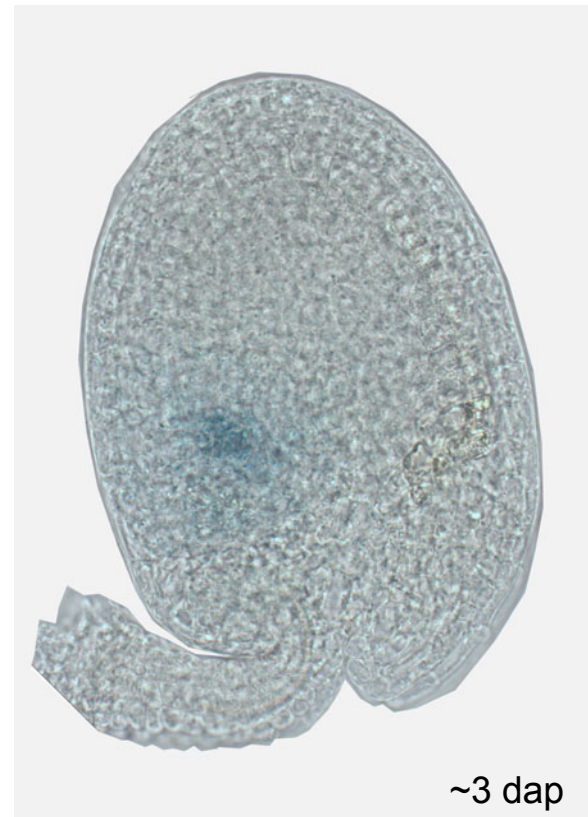

# AGL93

|                 |    |
|-----------------|----|
| #Lines analyzed | 17 |
| # Expressors    | 0  |

# AGL51

|                 |    |
|-----------------|----|
| #Lines analyzed | 17 |
| # Expressors    | 0  |

# AGL78

|                 |    |
|-----------------|----|
| #Lines analyzed | 17 |
| # Expressors    | 2  |

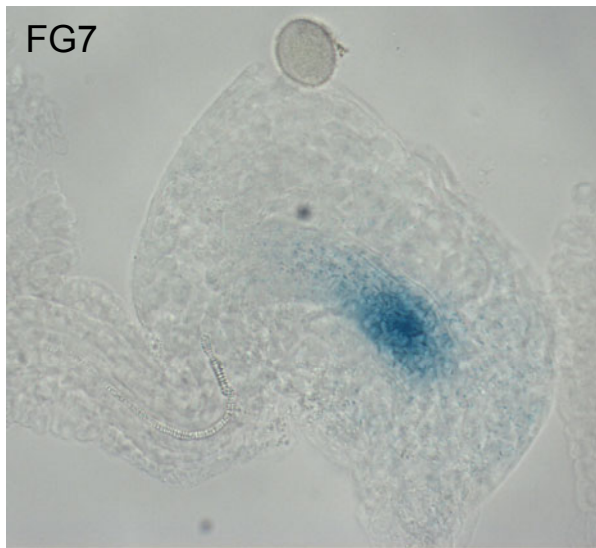



# AGL52

|                 |    |
|-----------------|----|
| #Lines analyzed | 17 |
| # Expressors    | 3  |

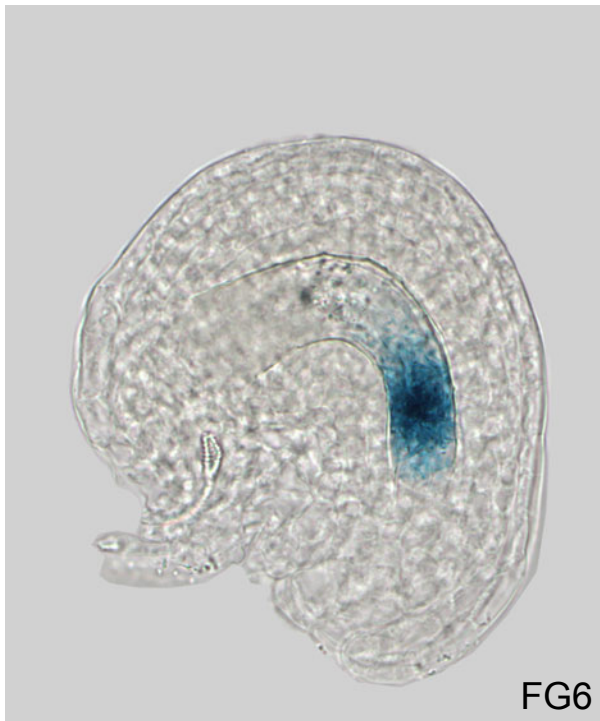

# AGL98

|                 |    |
|-----------------|----|
| #Lines analyzed | 17 |
| # Expressors    | 0  |

# AGL81

|                 |   |
|-----------------|---|
| #Lines analyzed | 8 |
| # Expressors    | 5 |

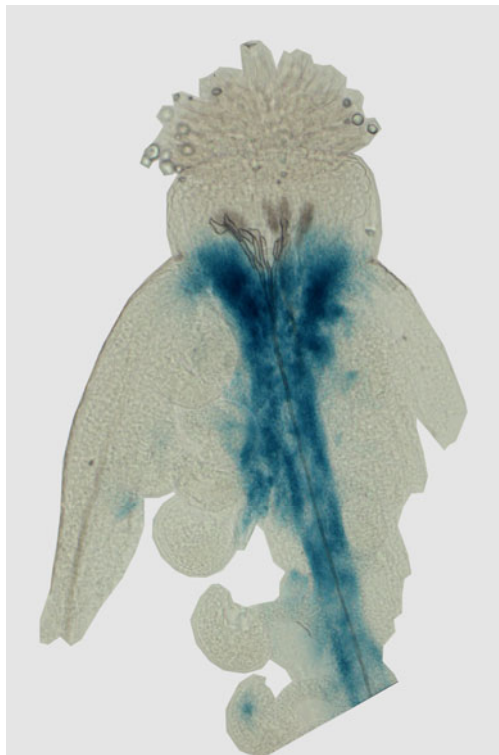

mature pistil

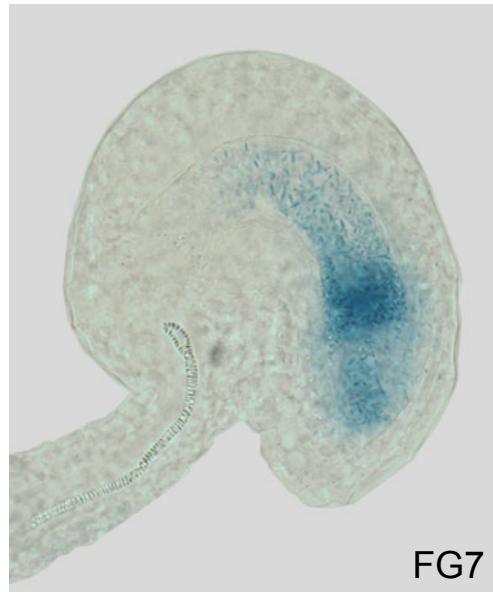

FG7

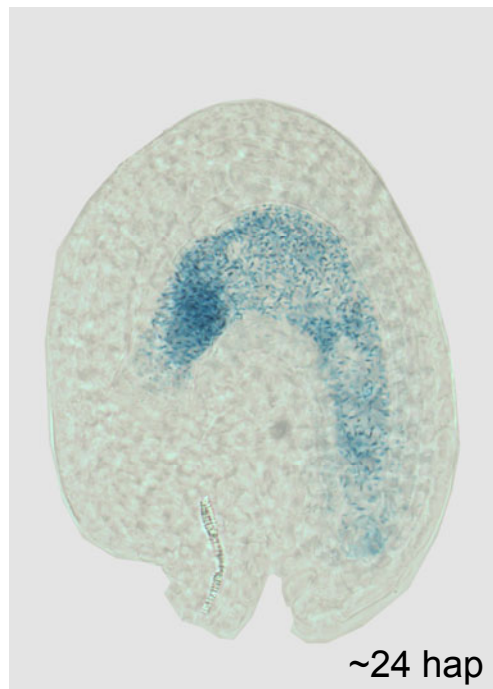

~24 hap

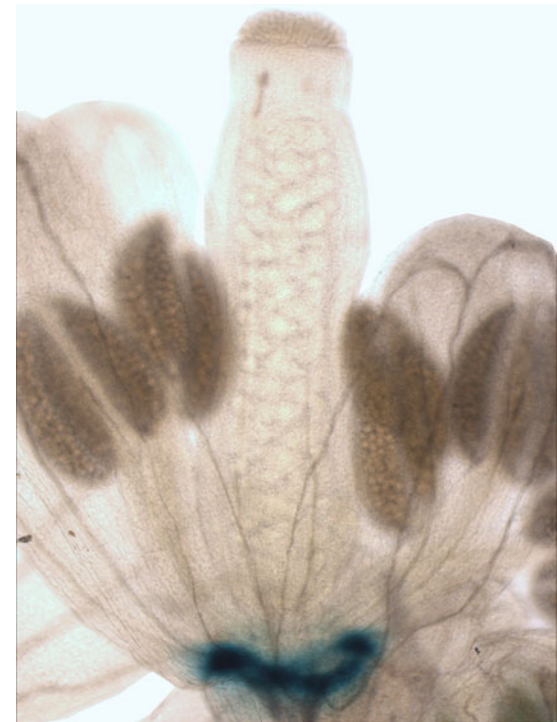

flower base

# AGL77

|                 |    |
|-----------------|----|
| #Lines analyzed | 17 |
| # Expressors    | 4  |

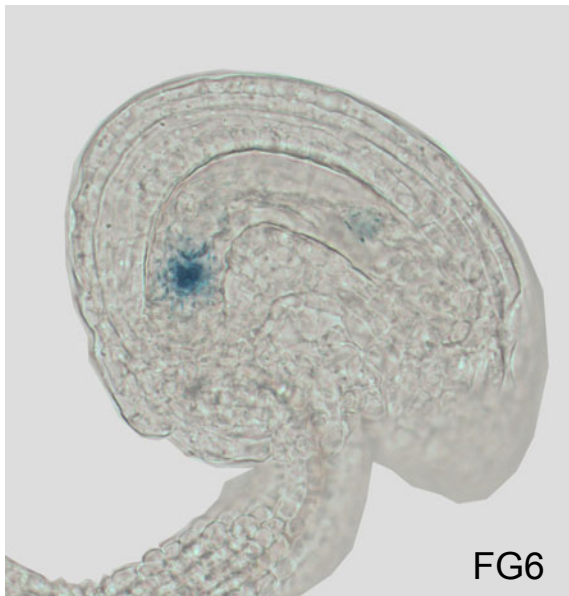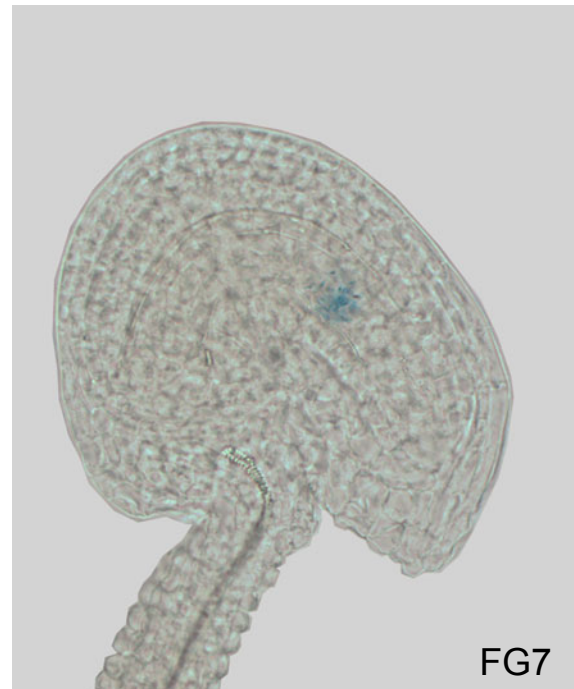

# AGL43

|                 |    |
|-----------------|----|
| #Lines analyzed | 17 |
| # Expressors    | 0  |

# AGL76

|                 |   |
|-----------------|---|
| #Lines analyzed | 0 |
| # Expressors    | 0 |

# AGL75

|                 |    |
|-----------------|----|
| #Lines analyzed | 15 |
| # Expressors    | 1  |

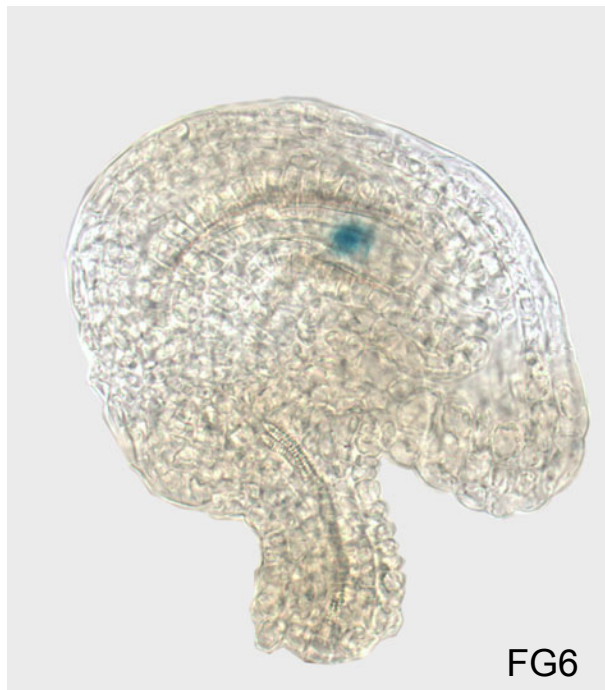

Supplement: pp.110.160770_1.pdf [file pp.110.160770_1.pdf]
